1 **Rapid transgenerational adaptation in response to intercropping increases**  
2 **facilitation and reduces competition**

3 **Laura Stefan**<sup>1</sup>, Nadine Engbersen<sup>1</sup>, Christian Schöb<sup>1</sup>

4 <sup>1</sup>Institute of Agricultural Sciences, ETH, Zürich, Switzerland

5

6

7 Summary:

8 **By capitalising on positive biodiversity-productivity relationships, intercropping provides**  
9 **opportunities to improve agricultural sustainability<sup>1</sup>. However, intercropping is generally**  
10 **implemented using commercial seeds that were bred for maximal productivity in monocultures,**  
11 **which might limit the benefits of crop diversity on yield<sup>2,3</sup>. Plants can adapt over generations to**  
12 **the level of surrounding plant diversity, notably through increases in niche differentiation<sup>4</sup>.**  
13 **However, this adaptation potential and the corresponding yield benefit potential have not been**  
14 **explored in annual crop systems. Here we show that plant–plant interactions among annual**  
15 **crops evolved towards increased facilitation and reduced competition when the plants’**  
16 **coexistence history matched their current diversity setting, which led to an increase in**  
17 **overyielding of up to 58%. These higher yield benefits were linked to character convergence**  
18 **between species sharing the same coexistence history for two generations. Notably, the six crop**  
19 **species tested converged towards taller phenotypes with lower leaf dry matter content when**  
20 **grown in mixtures. This study provides the first empirical evidence for the importance of**  
21 **parental diversity affecting plant–plant interactions and ecosystem functioning of the following**  
22 **generations in annual cropping systems. These results have important implications for**  
23 **diversified agriculture as they demonstrate the yield potential of targeted cultivars for**  
24 **intercropping, which can be achieved through specific breeding for mixtures.**

25

26 Following decades of studies demonstrating the positive relationship between species diversity and  
27 plant primary productivity in natural systems<sup>5,6</sup>, intercropping, i.e. growing more than two species in  
28 the same field during the same period, has been increasingly considered as a promising option to  
29 increase agricultural sustainability<sup>1,7</sup>. The productivity benefits of increasing species diversity rely on  
30 two main mechanisms, namely selection effects and complementarity effects, the latter encompassing  
31 both facilitation and niche differentiation<sup>8,9</sup>. In perennial natural grasslands, complementarity effects  
32 have been shown to increase over time due to evolutionary processes<sup>4,10,11</sup>. Notably, greater species  
33 complementarity can result from evolutionary changes<sup>12</sup> – i.e. changes in gene frequency – or from  
34 heritable epigenetic changes<sup>13</sup> affecting species traits in response to surrounding plant diversity, which  
35 either increases niche differentiation (i.e. reduces competition) or facilitation<sup>14</sup>. The evolutionary  
36 potential of plant–plant interactions in diverse communities has tremendous implications for the  
37 diversification of agricultural systems<sup>15</sup>. This is of particular relevance for mixed cropping systems,  
38 where the use of commercial seeds domesticated and bred for maximum yield in monoculture is the  
39 norm, which may compromise the diversity benefits<sup>2,3,16–18</sup>. Despite the paramount importance of this  
40 question, the yield potential of mixture-adapted varieties is, to our knowledge, unknown, as are the  
41 character differences of monoculture- compared to mixture-adapted crops. Therefore, in this project,  
42 we determined whether and how crop species adapt over three generations to the level of plant

43 diversity that they are surrounded by. We investigated how plant–plant interactions, i.e. competition  
 44 and facilitation, and plant traits changed and evolved within different coexistence histories over time,  
 45 and whether these changes translated into yield benefits. To that end, we conducted an intercropping  
 46 experiment in Switzerland with six different crop species commonly cultivated in Europe and  
 47 belonging to four functionally different phylogenetic groups. The mesocosms included monocultures,  
 48 13 different 2-species mixtures, four different 4-species mixtures, and isolated single plants, and was  
 49 replicated in two different fertilizing conditions. We selected open-pollinated varieties as seed source  
 50 to provide the genetic variability needed for evolutionary processes to occur. To assess potential  
 51 transgenerational changes, we repeated the experiment over the course of three years with seeds from  
 52 plants grown from either monocultures, mixtures, or single individual plants of the previous year (Fig.  
 53 1, Fig. 5).

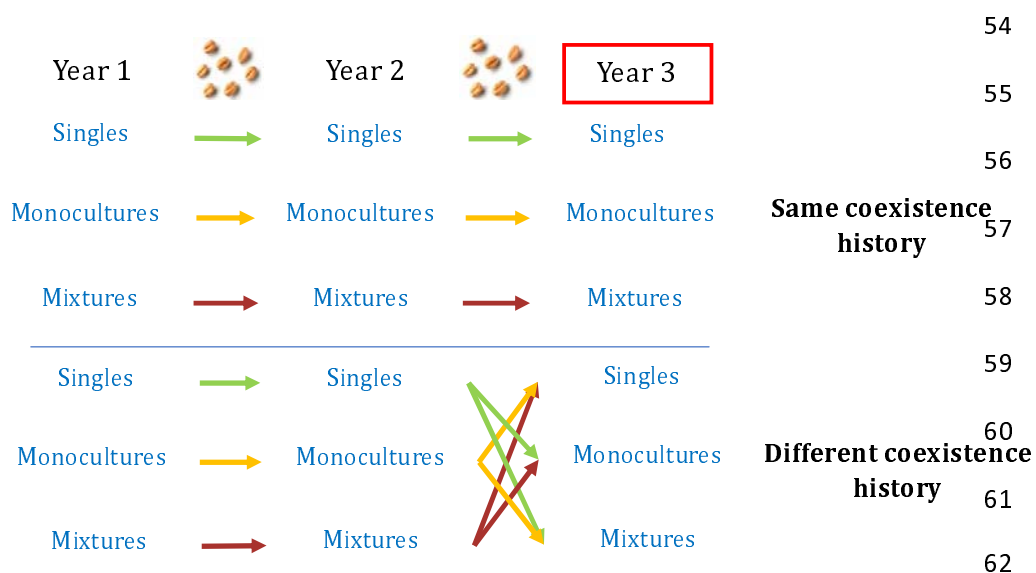

63 **Figure 1. Experimental design.** Six crop species were used to sow single plant individuals (6),  
 64 monocultures (6), 2-species mixtures (13) and 4-species mixtures (4) in 2018 (Year 1); seeds were  
 65 collected at the end of the growing season and resown in 2019 (Year 2) in the same diversity setting  
 66 as their previous generation. Seeds were collected again and resown in 2020 (Year 3), this time either  
 67 in the same community their seeds were collected from [same coexistence history], or in a community  
 68 different to the one of their parents [different coexistence history] ( $n = 468$  plots). This process was  
 69 replicated in two different fertilizing conditions. We expected that crops growing in the same  
 70 community as their parents would have adapted over the two generations, and therefore would exhibit  
 71 less competition and have higher productivity than crops growing in a community different to the one  
 72 of their parents.

73

74 Results from the third year showed that plant–plant interactions shifted towards stronger facilitation  
 75 and weaker competition when the plants were growing in the same community conditions than their  
 76 two previous generations (Fig. 2, Extended Data Fig. 1, Extended Data Table 1). More precisely, net

77 interaction index, as well as competition and facilitation indexes, were significantly higher when the  
78 crops were grown in the community their seeds were collected from than when they were growing in a  
79 community different to the one of their parents (Fig. 2, Extended Data Fig. 1; +54% for the net index,  
80 +9% for the competition index, +93% for the facilitation index). Pairwise comparisons further showed  
81 that this effect of coexistence history was particularly true in mixtures and only a trend in  
82 monocultures, for both fertilizing conditions (Extended Data Table 2). This notably demonstrates that  
83 in mixtures, mixture-adapted communities (i.e. with the same coexistence history) exhibited more  
84 facilitation and less competition than monoculture-adapted communities or single plant-adapted

85 communities (i.e. with a different  
86 coexistence history).

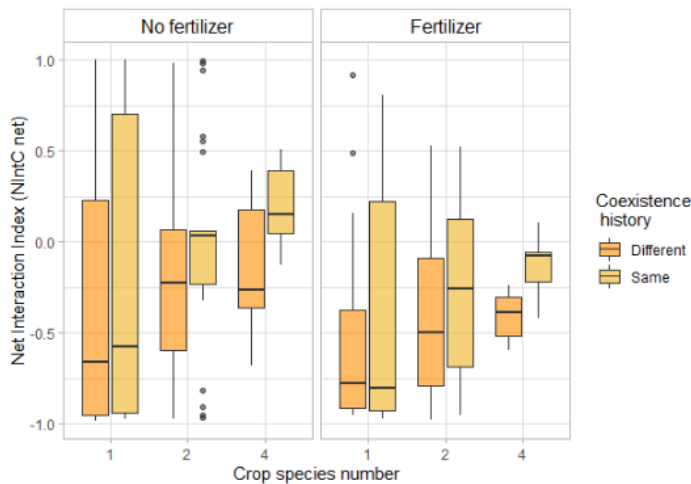

**Figure 2: Plant interaction index in response to coexistence history**

Net interaction index of monocultures, 2- and 4-species mixtures in response to coexistence history, for fertilized and unfertilized conditions. n =276. This index compares the performance of plants growing in communities to the performance of single plants (see Methods). Negative interaction index indicates

98 competition within a community, positive interaction index indicates facilitation. The closer this index  
99 gets to 1, respectively -1, the stronger the facilitation, respectively competition. “Same coexistence  
100 history” indicates that crops were grown in the community their seeds were collected from. “Different  
101 coexistence history” refers to crops grown in a community different to the one of their parents. The  
102 effect of fertilization and coexistence history were highly significant. See Extended Data Table 1 for the  
103 complete statistical analysis, and Extended Data Fig. 1 for competition and facilitation indexes.

104 Horizontal lines represent the median of the data, boxes represent the lower and upper quartiles (25% and 75%), with vertical  
105 lines extending from the hinge of the box to the smallest and largest values, no further than 1.5 \* the interquartile range. Data  
106 beyond the end of the whiskers are outlying and plotted individually.

107

108 This shift in plant–plant interactions was accompanied by a similar shift in net biodiversity effect (NE)  
109 in fertilized plots (Fig. 3a). Net biodiversity effect was calculated following the method of Loreau &  
110 Hector (2001) and represents the deviation from the expected yield in the mixture, based on the yield  
111 of the corresponding monocultures<sup>8</sup>. We observed that under fertilized conditions, NE was on average  
112 58% higher with the same coexistence history than with a different coexistence history (Fig. 3a,  
113 Extended Data Table 3), which corresponded to an increase in total yield ranging from 8 to 22% in  
114 mixtures (Fig. 3b). This indicates that in fertilized plots, the yield benefits of crop mixtures were  
115 higher with mixture-adapted individuals compared to monoculture-adapted and single-adapted  
116 individuals. Interestingly, in unfertilized plots we did not observe the same trend. When looking at the

117 partitioning of net effects into complementarity and selection effects<sup>8</sup>, we only observed a significant  
118 effect of coexistence history on selection effects under fertilized conditions for 4-species mixtures  
119 (Extended Data Fig. 2b).

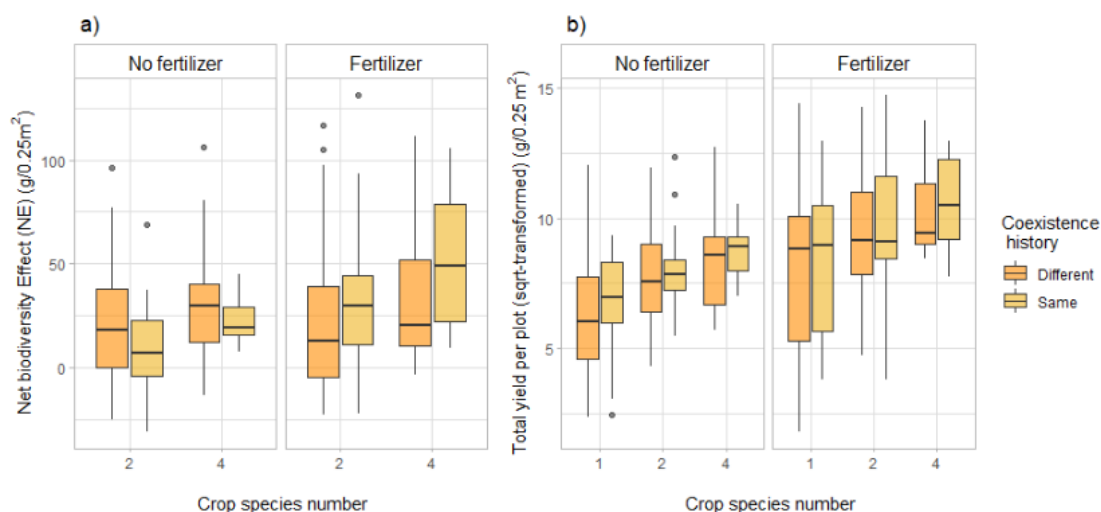

120

121 **Figure 3: Effects of coexistence history on net biodiversity effects (a) and total yield per plot (b)**

122 Effects of coexistence history and crop species number on (a) net biodiversity effect – reflecting the  
123 yield advantage of mixtures compared to monocultures – and (b) total yield per plot (square-root  
124 transformed) in fertilized and unfertilized plots. (a) n =276; (b) n=204. “Same coexistence history”  
125 indicates that crops were grown in the community their seeds were collected from. “Different  
126 coexistence history” refers to crops grown in a community different to the one of their parents. See  
127 Extended Data Table 3 & 4 for the complete statistical analysis, and Extended Data Fig. 2 for  
128 complementarity and selection effects.

129 Horizontal lines represent the median of the data, boxes represent the lower and upper quartiles (25% and 75%), with vertical  
130 lines extending from the hinge of the box to the smallest and largest values, no further than 1.5 \* the interquartile range. Data  
131 beyond the end of the whiskers are outlying and plotted individually.

132

133 To investigate the ecological mechanisms behind the shift in plant–plant interactions and biodiversity  
134 effects with coexistence history, we measured standard above-ground plant traits and compared the  
135 average values as well as coefficients of variation at the species and community levels of single-,  
136 monoculture- and mixture-adapted varieties. Following traditional niche theory, we expected that the  
137 observed reduction in competition would be linked to an increase in functional trait variation, thereby  
138 reflecting an increase in niche differentiation. Surprisingly, we did not observe character displacement  
139 – i.e. increased trait variation<sup>4</sup> – in our intercrop systems, but rather character convergence – i.e.  
140 reduced trait variation (Fig. 4). More specifically, we found a reduction in trait variation at the  
141 community level, notably of height and leaf dry matter content: the coefficient of variation of height  
142 was lower in the same coexistence history treatment compared to a different coexistence history (-9%)  
143 (Fig. 4d), and for leaf dry matter content it was 15% lower with the same history compared to a  
144 different history (Fig. 4e). Furthermore, the coefficient of variation of mass per seed was also lower

145 under the same history compared to a different history, but this effect was only significant in  
146 monocultures (-33%) (Fig. 4f). The community-weighted means of plant traits (CWM, calculated at  
147 the community level) further suggest that when growing in the same coexistence history, plants seem  
148 to converge towards taller individuals with lower leaf dry matter content. Indeed, the community-  
149 weighted mean of leaf dry matter content was significantly lower with the same coexistence history  
150 compared to a different history (-3%, Fig 4); height community-weighted mean was – although non-  
151 significantly – higher in the case of the same history compared to different coexistence history (Fig  
152 4a). We observed similar responses of height and leaf dry matter content at the species level (Extended  
153 Data Fig. 5 & 6, Extended Data Tables 5-9).

154

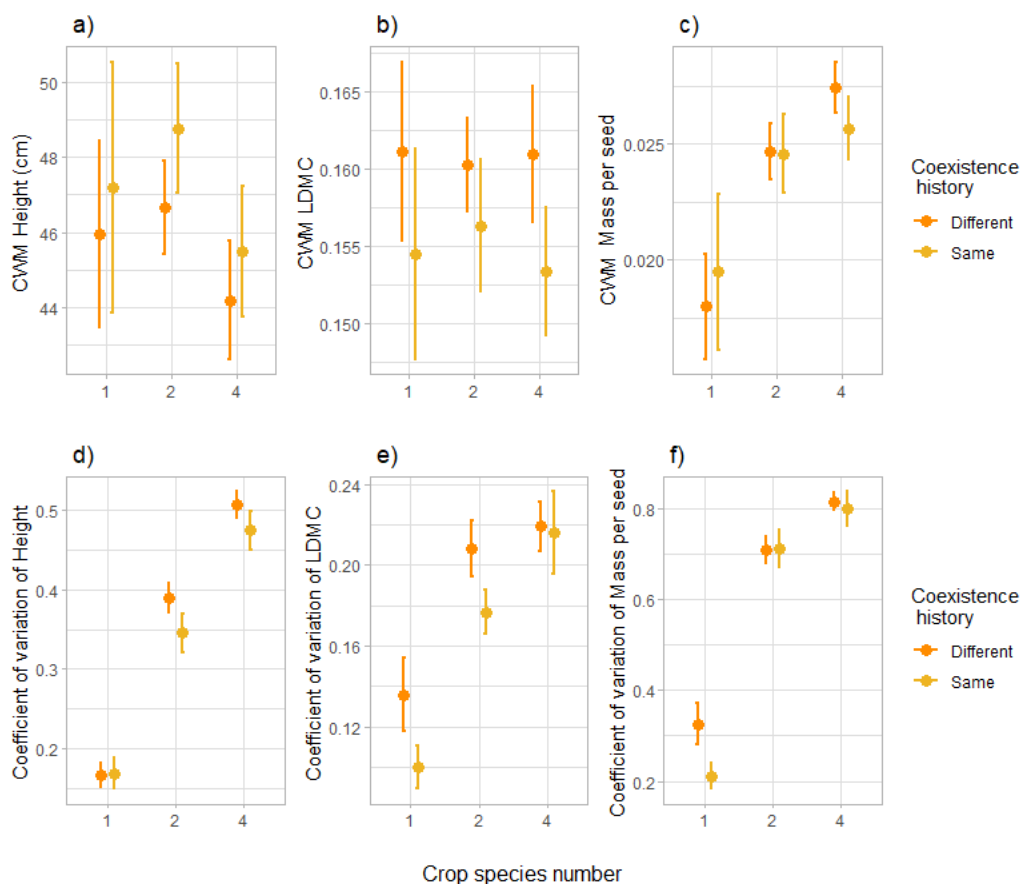

168

169 **Figure 4: Plot-level traits response to coexistence history**

170 Effects of coexistence history and crop species number on community-weighted mean (CWM) of  
171 height (in cm) (a), Leaf Dry Matter Content (LDMC) (b), and mass per seed (in g) (c), and on  
172 coefficient of variation at the community level of height (d), Leaf Dry Matter Content LDMC (e), and  
173 mass per seed (f). n= 271. “Same coexistence history” indicates that crops were grown in the  
174 community their seeds were collected from. “Different coexistence history” refers to crops grown in a  
175 community different to the one of their parents. Dots represent the mean values across plots; lines

176 represent the standard error. See Extended Data Tables 10-14 for the complete statistical analysis,  
177 and Extended Data Fig. 5-6 as well as Extended Data Tables 5-9 for responses at the species level.  
178

179 Our research demonstrates that, after only two generations, annual crop plants growing in the same  
180 diversity setting as their preceding generations showed reduced competition and increased facilitation  
181 compared to plants growing in a different diversity setting as their parents, which led to increased  
182 overyielding. We further investigated whether character displacement was responsible for this  
183 evolution of plant–plant interactions; contrary to our hypotheses, results did not show evidence for  
184 character displacement, but rather for character convergence in plant aboveground traits.

185 The observed shift in plant–plant interactions are consistent with several grassland studies  
186 investigating the effects of community evolution on community productivity and niche differentiation,  
187 where it was found that common rapid evolution in plant communities can lead to increases in  
188 ecosystem functioning<sup>4,10,11,19</sup>. We indeed observed a positive effect of common community history on  
189 the net biodiversity effect (i.e. overyielding), which means that the yield benefit of mixtures compared  
190 to monocultures was higher when the plants had been adapted to growing in mixtures (Fig. 3). This  
191 can explain why diversity effects generally increase over time<sup>20,21</sup>. Here we did not observe a  
192 significant increase in complementarity effect in response to common community history (Extended  
193 Data Fig. 2a). However, we observed a similar trend – although nonsignificant – for CE as for NE  
194 (Extended Data Fig. 2a): in fertilized plots, CE tended to be higher in the case of a mixture coexistence  
195 history, notably in 2-species mixtures. We suggest that the limited timeframe of this study – two  
196 generations – might be the reason for the lack of more significant changes in CE and emphasizes the  
197 need for longer-term research to confirm or infirm this trend. Surprisingly, selection effects also  
198 increased in 4-species mixtures in response to coexistence history (Extended Data Fig. 2b). This is  
199 unexpected, as selection effects have not, to our knowledge, been shown to increase over time<sup>22</sup>.  
200 However, it might be that this short common community history has favoured a specific species or a  
201 specific trait that was particularly plastic or beneficial for fitness<sup>23,24</sup>.

202 The above-mentioned increases in biodiversity, complementarity and selection effects were only  
203 present in fertilized conditions, which could indicate that the benefits of common community history  
204 might be dependent on the abiotic conditions. This is nonetheless consistent with several recent studies  
205 demonstrating that biodiversity effects are higher in high-inputs systems<sup>2,25,26</sup>, and emphasizes the role  
206 of fertilization in driving these effects. Indeed, by promoting crop growth and, consequently, higher  
207 competition between plants, fertilization may foster higher benefits of niche differentiation<sup>27–29</sup>.

208 Overall, increases in biodiversity effects are associated with changes in species traits in response to  
209 surrounding plant diversity<sup>4,14,30</sup>. Traditional hypotheses of trait and niche theory indeed predict that  
210 when several species co-occur closely together, selection over generations would favour character  
211 displacement that would reduce resource overlap and consequently increase niche differentiation<sup>31,32</sup>.

212 Surprisingly, here we found the reverse and observed that a reduction in trait variation favoured  
213 increased yield benefits in mixtures. Furthermore, functional diversity – calculated as the volume  
214 occupied in the space of the considered traits in this study<sup>33</sup> – did not respond to common coexistence  
215 history (Extended Data Fig. 7 & Table 15). While surprising, this result is not unheard of<sup>23</sup>, and  
216 suggests that our plants might have adapted to express the phenotype that would maximise their  
217 fitness<sup>34–36</sup>. This ideal phenotype is, in our mixture communities, characterized by taller plants with  
218 lower leaf dry matter content, the latter indicating soft leaves associated with rapid biomass  
219 production<sup>37</sup>, and consequently less resource-conservative strategies<sup>38</sup>. Lower leaf dry matter content  
220 has recently been associated with lower parental or ambient competition<sup>39</sup>, which is consistent with  
221 our results of plant–plant interaction intensities. The traits examined here did not allow to understand  
222 the mechanisms behind the observed reduction in competition; we suggest that other traits or processes  
223 not measured in this experiment might have responded to the coexistence history treatment. Notably,  
224 there could be a shift in below-ground traits, such as root-associated traits<sup>39</sup>, or temporal differentiation  
225 of resource capture<sup>40</sup>, such as light. We indeed observed a significant increase in light capture ability  
226 in plants coming from the same diversity setting compared to the same communities but a different  
227 coexistence history (Extended Data Fig. 8 & Table 16), which indicates that plants used to growing in  
228 the same diversity setting during several generations might capture the resources more fully than  
229 plants coming from a different diversity setting. However, here we rely on our light interception  
230 measurements and suggest more longer-term studies to understand changes in the use of other  
231 resources, such as nutrients or water, and how this is associated to plant traits. Furthermore, the scope  
232 of this study did not allow us to investigate the mechanisms behind these changes in plant-plant  
233 interactions and traits in response to coexistence history. The adaptation response might be  
234 genetically-based and due to natural selection<sup>11</sup>, as we specifically selected open-pollinated varieties in  
235 order to ensure a minimum amount of genetic variability. Furthermore, outcrossing could have  
236 occurred in the first year of this experiment, as we had a similar experiment running in the same  
237 experimental garden with Spanish varieties from the same species<sup>27,41</sup>. However, considering the short  
238 timeframe of this study and the low rate of outcrossing in most of our species, epigenetic changes –  
239 i.e, stable heritable changes in cytosine methylation – might also have played an important role as  
240 potential evolutionary mechanisms<sup>13,42–46</sup>.

241 For the first time, our study provides empirical evidence for rapid transgenerational adaptation in  
242 response to diversity history in annual crop communities. Notably, we demonstrated that when plants  
243 were coming from the same diversity setting as their parents, plant–plant interactions shifted towards  
244 reduced competition and increased facilitation. This effect was particularly true for mixtures and  
245 translated into enhancedoveryielding under fertilized conditions. This reduction in competition was  
246 surprisingly not linked to character displacement, but we instead observed character convergence  
247 towards taller plants with lower leaf dry matter content. This research emphasizes the importance of  
248 considering transgenerational effects of diversity for crop mixtures. This is particularly relevant for



249 breeding programs and highlights the need of including diversity when breeding for crop mixtures, in  
250 order to design varieties specifically adapted for intercropping<sup>17</sup>.

251

252

253

254

255

## 256 References

- 257 1. Brooker, R. W. *et al.* Improving intercropping: a synthesis of research in agronomy, plant  
258 physiology and ecology. *New Phytol.* **206**, 107–117 (2015).
- 259 2. Chen, J. *et al.* Diversity increases yield but reduces reproductive effort in crop mixtures.  
260 *bioRxiv* 2020.06.12.149187 (2020) doi:10.1101/2020.06.12.149187.
- 261 3. Thrall, P. H. Darwinian Agriculture: How understanding evolution can improve agriculture R.  
262 Ford Denison 2012. Princeton University Press. *Evolutionary Applications* vol. 6 408–410  
263 (2013).
- 264 4. Zuppinger-Dingley, D. *et al.* Selection for niche differentiation in plant communities increases  
265 biodiversity effects. *Nature* **515**, 108–111 (2014).
- 266 5. Tilman, D. *et al.* Diversity and productivity in a long-term grassland experiment. *Science* (80-  
267 ). **294**, 843–845 (2001).
- 268 6. Spehn, E. M. *et al.* Ecosystem effects of biodiversity manipulations in european grasslands.  
269 *Ecol. Monogr.* **75**, 37–63 (2005).
- 270 7. Gurr, G. M. *et al.* Multi-country evidence that crop diversification promotes ecological  
271 intensification of agriculture. *Nat. plants* **2**, 16014 (2016).
- 272 8. Loreau, M. & Hector, A. Partitioning selection and complementarity in biodiversity  
273 experiments. *Nature* **412**, 72–76 (2001).
- 274 9. Hooper, D. U. *et al.* Effects of biodiversity on ecosystem functioning: a consensus of current  
275 knowledge. *Ecol. Monogr.* **75**, 3–35 (2005).
- 276 10. van Moorsel, S. J. *et al.* Community evolution increases plant productivity at low diversity.  
277 *Ecol. Lett.* **21**, 128–137 (2018).
- 278 11. van Moorsel, S. J. *et al.* Evidence for rapid evolution in a grassland biodiversity experiment.

- 279 *Mol. Ecol.* **28**, 4097–4117 (2019).
- 280 12. Anderson, J. T., Willis, J. H. & Mitchell-Olds, T. Evolutionary genetics of plant adaptation.  
281 *Trends Genet.* **27**, 258–266 (2011).
- 282 13. Verhoeven, K. J. F., VonHoldt, B. M. & Sork, V. L. Epigenetics in ecology and evolution:  
283 what we know and what we need to know. *Mol. Ecol.* **25**, 1631–1638 (2016).
- 284 14. Schöb, C., Brooker, R. W. & Zuppinger-Dingley, D. Evolution of facilitation requires diverse  
285 communities. *Nat. Ecol. Evol.* **2**, 1381–1385 (2018).
- 286 15. Isbell, F. *et al.* Benefits of increasing plant diversity in sustainable agroecosystems. *Journal of*  
287 *Ecology* vol. 105 871–879 (2017).
- 288 16. Chacón-Labela, J., García Palacios, P., Matesanz, S., Schöb, C. & Milla, R. Plant  
289 domestication disrupts biodiversity effects across major crop types. *Ecology Letters* vol. 22  
290 1472–1482 (2019).
- 291 17. Wuest, S. E., Peter, R. & Niklaus, P. A. Ecological and evolutionary approaches to improving  
292 crop variety mixtures. *Nat. Ecol. Evol.* 1–10 (2021) doi:10.1038/s41559-021-01497-x.
- 293 18. Annicchiarico, P. *et al.* Do we need specific breeding for legume-based mixtures? *Adv. Agron.*  
294 **157**, 141–215 (2019).
- 295 19. van Moorsel, S. J. *et al.* Co-occurrence history increases ecosystem stability and resilience in  
296 experimental plant communities. *Ecology* **102**, (2021).
- 297 20. Meyer, S. T. *et al.* Effects of biodiversity strengthen over time as ecosystem functioning  
298 declines at low and increases at high biodiversity. *Ecosphere* **7**, e01619 (2016).
- 299 21. Allan, E. *et al.* More diverse plant communities have higher functioning over time due to  
300 turnover in complementary dominant species. *Proc. Natl. Acad. Sci. U. S. A.* **108**, 17034–17039  
301 (2011).
- 302 22. Cardinale, B. J. *et al.* Impacts of plant diversity on biomass production increase through time  
303 because of species complementarity. *Proc. Natl. Acad. Sci.* **104**, 18123–18128 (2007).
- 304 23. Colom, S. M. & Baucom, R. S. Belowground competition favors character convergence but not  
305 character displacement in root traits. *New Phytol.* (2020) doi:10.1111/nph.17100.
- 306 24. Turcotte, M. M. & Levine, J. M. Phenotypic Plasticity and Species Coexistence. *Trends in*  
307 *Ecology and Evolution* vol. 31 803–813 (2016).
- 308 25. Li, C. *et al.* Syndromes of production in intercropping impact yield gains. *Nat. Plants* **6**, 653–  
309 660 (2020).

- 310 26. Stefan, L., Hartmann, M., Engbersen, N., Six, J. & Schöb, C. Positive Effects of Crop Diversity  
311 on Productivity Driven by Changes in Soil Microbial Composition. *Front. Microbiol.* **12**, 808  
312 (2021).
- 313 27. Stefan, L., Engbersen, N. & Schöb, C. Crop–weed relationships are context □dependent and  
314 cannot fully explain the positive effects of intercropping on yield. *Ecol. Appl.* (2021)  
315 doi:10.1002/eap.2311.
- 316 28. Bertness, M. D. & Callaway, R. Positive interactions in communities. *Trends Ecol. Evol.* **9**,  
317 191–193 (1994).
- 318 29. Goldberg, D. & Novoplansky, A. *On the Relative Importance of Competition in Unproductive*  
319 *Environments*. *Source: Journal of Ecology* vol. 85 <https://www.jstor.org/stable/2960565>  
320 (1997).
- 321 30. Abakumova, M., Zobel, K., Lepik, A. & Semchenko, M. Plasticity in plant functional traits is  
322 shaped by variability in neighbourhood species composition. *New Phytol.* **211**, 455–463  
323 (2016).
- 324 31. Pfennig, K. S. & Pfennig, D. W. Character displacement: ecological and reproductive  
325 responses to a common evolutionary problem. *Quarterly Review of Biology* vol. 84 253–276  
326 (2009).
- 327 32. Losos, J. B. Ecological character displacement and the study of adaptation. *Proceedings of the*  
328 *National Academy of Sciences of the United States of America* vol. 97 5693–5695 (2000).
- 329 33. Petchey, O. L. & Gaston, K. J. Functional diversity (FD), species richness and community  
330 composition. *Ecol. Lett.* **5**, 402–411 (2002).
- 331 34. Fox, J. W. & Vasseur, D. A. Character convergence under competition for nutritionally  
332 essential resources. *Am. Nat.* **172**, 667–680 (2008).
- 333 35. Grant, P. R. Convergent and divergent character displacement. *Biol. J. Linn. Soc.* **4**, 39–68  
334 (1972).
- 335 36. Weedon, D. O. & Finckh, R. M. Response of wheat composite cross populations to disease and  
336 climate variation over 13 generations. *Front. Agr. Sci. Eng* **2021**, 400–415.
- 337 37. Díaz, S. *et al.* The global spectrum of plant form and function. *Nature* **529**, 167–171 (2016).
- 338 38. Reich, P. B. The world-wide ‘fast-slow’ plant economics spectrum: A traits manifesto. *J. Ecol.*  
339 **102**, 275–301 (2014).
- 340 39. Puy, J. *et al.* Competition-induced transgenerational plasticity influences competitive  
341 interactions and leaf decomposition of offspring. *New Phytol.* **7**, 3497–3507 (2020).

- 342 40. Engbersen, N., Brooker, R. W., Stefan, L., Studer, B. & Schöb, C. Temporal differentiation of  
343 resource capture and biomass accumulation as a driver of yield increase in intercropping.  
344 *Front. Plant Sci.* **12**, 926 (2021).
- 345 41. Chen, J. *et al.* Diversity increases yield but reduces harvest index in crop mixtures. *Nat. Plants*  
346 *2021* 1–6 (2021) doi:10.1038/s41477-021-00948-4.
- 347 42. Cortijo, S. *et al.* Mapping the epigenetic basis of complex traits. *Science (80-. )*. **343**, 1145–  
348 1148 (2014).
- 349 43. Van Der Graaf, A. *et al.* Rate, spectrum, and evolutionary dynamics of spontaneous  
350 epimutations. *Proc. Natl. Acad. Sci. U. S. A.* **112**, 6676–6681 (2015).
- 351 44. Saze, H., Scheid, O. M. & Paszkowski, J. Maintenance of CpG methylation is essential for  
352 epigenetic inheritance during plant gametogenesis. *Nat. Genet.* *2003 341* **34**, 65–69 (2003).
- 353 45. Springer, N. M. Epigenetics and crop improvement. *Trends Genet.* **29**, 241–247 (2013).
- 354 46. Puy, J., Carmona, C. P., Dvořáková, H., Latzel, V. & De Bello, F. Diversity of parental  
355 environments increases phenotypic variation in Arabidopsis populations more than genetic  
356 diversity but similarly affects productivity. *Ann. Bot.* **127**, 425–436 (2021).
- 357
- 358
- 359
- 360
- 361
- 362
- 363

## 364 **Methods**

### 365 *Study sites*

366 The Crop Diversity Experiment took place in 2018, 2019, and 2020 in an outdoor  
367 experimental garden located at the Irchel campus of the University of Zurich, Switzerland  
368 (47.3961 N, 8.5510 E, 508 m a.s.l). Zurich is characterized by a temperate climate<sup>27</sup>. The  
369 experimental garden was irrigated during the growing season with the aim of maintaining a  
370 sufficient amount of water for optimal plant growth. The dry threshold of soil moisture was  
371 set at 50% of field capacity, with a target soil moisture of 90% of field capacity. Whenever  
372 dry thresholds were reached (measured through PlantCare soil moisture sensors (PlantCare  
373 Ltd., Switzerland), irrigation was initiated, and water added until reaching the target value.

374 Each experimental garden consisted of square plots of 0.25 m<sup>2</sup>. The uppermost 30 cm were  
375 filled with standard, not enriched, agricultural soil coming from the local region. This soil  
376 consisted of 45 % sand, 45 % silt, and 10 % clay, and initially contained 0.19 % nitrogen (N),  
377 3.39 % carbon (C), and 332 mg total phosphorous (P)/kg, with a mean pH of 7.25. Beneath  
378 that, there was local soil of uncharacterized properties that allowed unlimited root growth.  
379 The plots were embedded into larger beds of 7 x 1 m, each bed containing 28 plots. Inside a  
380 bed, plots were separated from each other by metal frames. While the relatively small plot  
381 sizes allowed us to undertake a large experiment under environmentally highly controlled but  
382 realistic outdoor conditions, some variables can suffer edge effects and interferences with  
383 neighbouring plots. However, such effects would probably increase residual variation more  
384 than between-treatment variation, because randomization was used to prevent confounding of  
385 between-plot interactions with treatments. In the only relevant study of which we are aware,  
386 the biodiversity–productivity relationship in herbaceous communities was not affected by plot  
387 size<sup>47</sup> while a recent theoretical study showed that, if anything, biodiversity effects should  
388 increase with plot size<sup>48</sup>.

389 We therefore assume that effect size in our experiment, if anything, is probably rather  
390 conservatively estimated compared with that in studies using larger plot sizes.

391 Every year, we fertilized half of the beds with N, P and potassium (K) at the concentration of  
392 120 kg/ha N, 205 kg/ha P, and 120 kg/ha K. Fertilizers were applied three times per year,  
393 namely once just before sowing (50 kg/ha N, 85 kg/ha P, 50 kg/ha K), once when wheat was  
394 at the tillering stage (50 kg/ha N, 85 kg/ha P, 50 kg/ha K), and once when wheat was  
395 flowering (20 kg/ha N, 34 kg/ha P, 20 kg/ha K). The other half of the beds served as  
396 unfertilized controls. In 2018, we randomly allocated individual beds to a fertilized or non-  
397 fertilized control treatment. In the following years, we kept the initial fertilization treatment  
398 allocation.

### 399 *Crop species*

400 Experimental communities were constructed with six annual crop species of agricultural  
401 interest. We selected only seed crops with similar growth requirements in terms of climate  
402 and length of growing season, and with similar plant sizes to fit at least 40 individuals in the  
403 rather small plots. The six species belong to four different phylogenetic groups with varying  
404 functional characteristics: we first separated monocots [*Triticum aestivum* (wheat, C3 grass,  
405 Poaceae) and *Avena sativa* (oat, C3 grass, Poaceae)] and dicots. Among the dicots, we  
406 differentiated between suparasterids [*Coriandrum sativum* (coriander, herb, Apiaceae)] and  
407 superrosids. Among the superrosids, we separated legumes [*Lens culinaris* (lentil, legume,  
408 Fabaceae)] from non-legumes [*Linum usitatissimum* (flax, herb, Lineaceae) and *Camelina*  
409 *sativa* (false flax, herb, Brassicaceae)]. Furthermore, we chose crop varieties that were locally  
410 adapted and commercially available in Switzerland (Table 1).

411

412

| Species                    | Switzerland |                                |     |
|----------------------------|-------------|--------------------------------|-----|
|                            | Ecotype     | Supplier                       |     |
| <i>Avena sativa</i>        | Canyon      | Sativa Rheinau                 | 413 |
| <i>Triticum aestivum</i>   | Fiorina     | DSP, Delley                    | 414 |
| <i>Coriandrum sativum</i>  | Indian      | Zollinger Samen, Les Evouettes | 415 |
| <i>Lens culinaris</i>      | Anicia      | Agroscope, Reckenholz          | 416 |
| <i>Camelina sativa</i>     | n.a.        | Zollinger Samen, Les Evouettes |     |
| <i>Linum usitatissimum</i> | Lirina      | Sativa Rheinau                 | 417 |

418

419 **Table 1.** List of crop species ecotypes and their suppliers.

420 *Avena Sativa* (oat) is mainly self-pollinating, with outcrossing rates of around 1%<sup>52</sup>. The  
421 variety Canyon was acquired in 2014 through conventional selection processes.

422 *Triticum aestivum* (wheat) is principally self-pollinating, with outcrossing rates generally  
423 between 1 and 4%<sup>49,50</sup>, although some cultivars have been shown to have outcrossing rates up  
424 to 8%<sup>51</sup>. Fiorina is an accession originating from Switzerland, acquired in 2015, specifically  
425 for organic agriculture.

426 *Coriandrum sativum* (coriander) has a generally high genetic variability, with studies showing  
427 up to 70.46% polymorphism, indicating the presence of high degree of molecular  
428 variation in the studied coriander varieties<sup>58,59</sup>. The variety that we used originally came  
429 from an Indian market and was not a fixed variety, which ensured a minimum of genetic  
430 variability. The flowers of coriander are self-incompatible but plants are self-compatible.

431 Geitonogamy is therefore common. Cross-pollination is facultative but can reach up to 20%<sup>60</sup>.

432 *Lens culinaris* (lentil) is mainly self-pollinating; depending on the cultivar, outcrossing rates  
433 reach between 1 and 5%<sup>53</sup>.

434 *Camelina sativa* (camelina) is mainly self-pollinating, with outcrossing rates of less than  
435 1%<sup>61,62</sup>. In the study, we used a local landrace that was not a fixed variety.

436 *Linum usitatissimum* (flax) is mainly self-pollinating but outcrossing does occur, at a rate of  
437 1-5%<sup>54</sup>. Lirina, the variety of *Linum* that we used has been defined by ProSpecieRara as a rare  
438 or ancient variety. ProSpecieRara ensures the preservation of rare traditional varieties<sup>55</sup>.  
439 Furthermore, studies have shown that linseed varieties have higher genetic variability than  
440 fiber flax and should therefore be considered as valuable genetic resources<sup>56,57</sup>.

#### 441 *Experimental crop communities*

442 Experimental communities consisted of single plots with one individual, monocultures, 2- and  
443 4-species mixtures (Fig. 5). We planted every possible combination of 2-species mixtures  
444 with two species from different phylogenetic groups and every possible 4-species mixture  
445 with a species from each of the four different phylogenetic groups present (Table 2). We  
446 replicated the experiment two times with the exact same species composition, except for  
447 single individuals which were replicated 4 times. Monoculture and mixture plots were  
448 randomized among plots and beds within each fertilizer treatment, while single plant plots  
449 were randomly allocated to plots in separate beds in order to minimize interference among  
450 neighbouring plots. Each monoculture and mixture community consisted of one, two or four  
451 species planted in four rows. Two species mixtures were organized following a  
452 speciesA|speciesB|speciesA|speciesB pattern. The order of the species was chosen randomly.  
453 For 4-species mixtures, the order of the species was also randomized. Density of sowing  
454 differed among species groups and was based on current cultivation practices: 160 seeds/m<sup>2</sup>  
455 for legumes, 240 seeds/m<sup>2</sup> for superasterids, 400 seeds/m<sup>2</sup> for cereals, and 592 seeds/m<sup>2</sup> for  
456 superrosids. Each year, seeds were sown by hand in early April.

457

458

459



460

461

462 **Table 2.** List of species mixture combinations.

463

| <i>Monoculture</i> | <i>2-species mixtures</i> | <i>2-species mixtures</i> | <i>4-species mixtures</i>               |
|--------------------|---------------------------|---------------------------|-----------------------------------------|
| Avena              | Avena-Lens                | Lens- <i>Linum</i>        | Avena-Lens- <i>Linum</i> -Coriandrum    |
| Triticum           | Avena- <i>Linum</i>       | Lens-Camelina             | Avena-Lens-Camelina-Coriandrum          |
| Lens               | Avena-Camelina            | Lens-Coriandrum           | Triticum-Lens- <i>Linum</i> -Coriandrum |
| <i>Linum</i>       | Avena-Coriandrum          | <i>Linum</i> -Coriandrum  | Triticum-Lens-Camelina-Coriandrum       |
| Camelina           | Triticum-Lens             | Camelina-Coriandrum       |                                         |
| Coriandrum         | Triticum- <i>Linum</i>    | Triticum-Coriandrum       |                                         |
|                    | Triticum-Camelina         |                           |                                         |

464

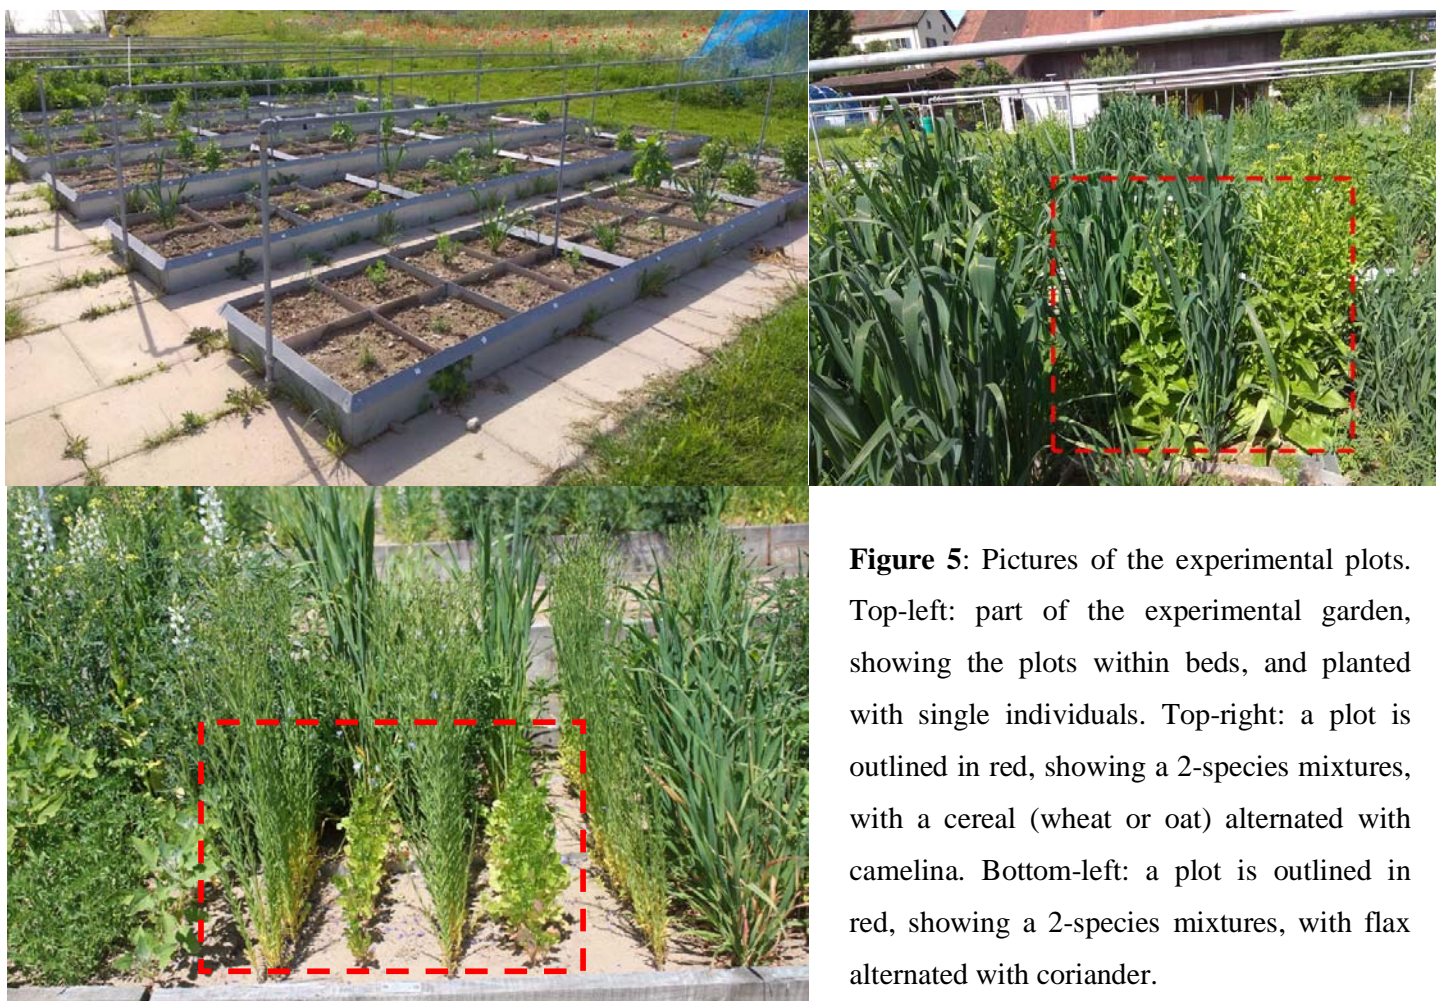

**Figure 5:** Pictures of the experimental plots. Top-left: part of the experimental garden, showing the plots within beds, and planted with single individuals. Top-right: a plot is outlined in red, showing a 2-species mixtures, with a cereal (wheat or oat) alternated with camelina. Bottom-left: a plot is outlined in red, showing a 2-species mixtures, with flax alternated with coriander.

473 *Adaptation treatment*

474 In 2019, we used the seeds collected in 2018 to add a coexistence history treatment: we  
475 repeated the experiment with seeds coming from single individuals, monocultures, and  
476 mixtures, respectively. This means that each plot described above was repeated three times:  
477 once with seeds coming from single plants, once with seeds coming from monoculture plants,  
478 and once with seeds coming from mixture plants. We respected the fertilizing treatment, i.e.  
479 there was a history treatment for each fertilizing condition. When planting the mixtures with a  
480 mixture history, we specifically used seeds coming from the same species combination. When  
481 planting the monocultures and singles with a mixture history, we used seeds coming from a  
482 common pool combining all 4-species mixtures.

483 In 2020, we repeated this process and selected seeds from 2019 to sow the single and  
484 community plots. We only selected seeds that had a “pure” history, i.e. that were always  
485 grown in the same coexistence history (for instance, for single history seeds in 2020 we  
486 selected only seeds that were grown as singles also in 2018 and 2019).

487

488 *Data collection*

489 **Photosynthetically Active Radiation (PAR):** Interception of PAR by the plant canopy was  
490 measured weekly with a LI-1500 (LI-COR Biosciences GmbH, Germany). In each plot, three  
491 PAR measurements were taken around noon by placing the sensor on the soil surface in the  
492 center of each of the three in-between rows. Light measurements beneath the canopy were  
493 compared to ambient radiation through simultaneous PAR measurements of a calibration  
494 sensor, which was mounted on a vertical post at 2 m above ground in the middle of the  
495 experimental garden. FPAR (%) indicates the percentage of PAR that was intercepted by the  
496 crop canopy.

497 **Traits measurements:** At the time of flowering, three individuals per crop species per plot  
498 were randomly marked. We measured the height of each individual with a ruler from the soil  
499 surface to the highest photosynthetically active tissue. We then measured plant width with a  
500 ruler by taking the largest horizontal distance between two photosynthetically active tissues.  
501 We sampled one healthy leaf from each marked individual and immediately wrapped this leaf  
502 in moist cotton; this was stored overnight at room temperature in open plastic bags. The  
503 following day, we removed any excess surface water on the leaf and weighed it to obtain its  
504 water saturated weight<sup>63</sup>. Then this leaf was scanned with a flatbed scanner (CanoScan LiDE  
505 120, Canon), oven-dried in a paper envelope at 80°C for 72 hours, and subsequently  
506 reweighed to obtain its dry weight. We calculated Leaf Dry Matter Content (LDMC) as the  
507 ratio of leaf dry mass (g) to water saturated leaf mass (g). Using the leaf scans, we measured  
508 leaf area with the image processing software ImageJ<sup>64</sup>. Specific Leaf Area (SLA) was then  
509 calculated as the ratio of leaf area (cm<sup>2</sup>) to dry mass (g).

510 **Plot grain yield and biomass:** Grain yield and aboveground biomass of each crop species  
511 was determined per plot at maturity. This corresponded to July/August. As time of maturity  
512 slightly varied among the different crop species, we conducted harvest species by species. We  
513 clipped plants right above the soil surface and separated seeds from the vegetative parts.  
514 Seeds were sun-dried for five days and weighed. Biomass was oven-dried at 80 °C until  
515 constant weight and weighed.

516 **Individual yield and biomass:** We harvested the three marked individuals for the trait  
517 measurements separately; we separated seeds from aboveground biomass and they were both  
518 dried and weighed as previously mentioned. Furthermore, for each marked individual we  
519 weighed ten randomly selected seeds to obtain the mass per seed.

520 *Data analyses*

521 All analyses were performed using R version 4.1.0<sup>65</sup>. **Plant Interaction Index:** Plant  
522 interaction intensity in the plots was calculated for each marked individual by means of the  
523 neighbor-effect intensity index with commutative symmetry NIntC<sup>66</sup>:

$$524 \quad NIntC = 2 \times \frac{yield_{comm} - yield_{single}}{yield_{comm} + yield_{single} + |yield_{comm} - yield_{single}|} \quad (1)$$

525 , where  $yield_{single}$  is the yield of a single plant grown in isolation, and  $yield_{comm}$  is the  
526 yield of an individual of the same species when grown in a community. NIntC values of all  
527 species ( $a, b, c, d$ ) composing the community (i.e. species a in case of a monoculture and  
528 species a to d in case of a mixture of four species) were averaged and subsequently weighted  
529 by their proportional abundance  $r_i = \frac{1}{number\ of\ species}$  to calculate the mean net interaction in  
530 the community (NIntCnet):

$$531 \quad NIntCnet = \sum_{i=a}^d (NIntC_i r_i) \quad (2)$$

532 We then partitioned this net interaction index into its facilitation and competition components:  
533 NIntC facilitation was obtained subsetting those individuals with a positive NIntC value (i.e.  
534 with increased performance in communities compared to single plant individuals without  
535 neighbour interactions) and calculating the mean of all the species per plot weighed by their  
536 relative abundance; NIntC competition was obtained by subsetting those individuals with a  
537 negative NIntC value (i.e. with reduced performance in communities compared to single plant  
538 individuals without neighbour interactions) and calculating the mean of all the species per plot  
539 weighed by their relative abundance.

$$540 \quad NIntC_{facil} = \sum_{i=a}^d (NIntC_i > 0 \times r_i) \quad (3)$$

$$541 \quad NIntC_{comp} = \sum_{i=a}^d (NIntC_i < 0 \times r_i) \quad (4)$$

542

543 **Net biodiversity effect:** For all mixture communities we quantified the net biodiversity effect  
544 (NE) and its two components, the complementarity and selection effects according to Loreau  
545 and Hector<sup>8</sup>:

$$546 \quad NE = N \cdot \overline{\Delta RY} \cdot \bar{M} + N \cdot cov(\Delta RY, M) \quad (5)$$

547 where N is the number of species in the plot,  $\Delta RY$  is the deviation from expected relative  
548 yield of the species in mixture in the respective plot, which is calculated as the ratio of  
549 observed relative yield of the species in mixture to the yield of the species in monoculture,  
550 and M is the yield of the species in monoculture. The first component of the biodiversity  
551 effect equation ( $N \cdot \overline{\Delta RY} \cdot \bar{M}$ ) is the complementarity effect (CE), while the second  
552 component ( $N \cdot cov(\Delta RY, M)$ ) is the selection effect (SE).

553

554 **Total crop yield:** To assess crop performance, we calculated total crop yield per plot as the  
555 sum of total seed mass per species.

556 **Trait analyses:** Traits were analysed both at the species-level and at the plot-level. At the  
557 species level, we calculated the mean and coefficient of variation (CV) per species for each  
558 trait per plot. At the plot-level, we calculated Community-Weighted-Means (CMW) based on  
559 biomass per species, and coefficient of variation per plot for each trait.

560 Functional richness (FRic) was calculated in each plot using the function *dbFD* from the  
561 package *FD*<sup>67</sup>, by measuring the convex hull volume occupied by the individuals of a plot in  
562 the space of the considered traits.

563 To analyze the effects of the experimental treatments on NIntCnet, NIntCfacil, NIntCcomp,  
564 NE, CE, LER, total crop yield, FRic, and CWM and CV per plot, we used generalized linear  
565 mixed models using the function *lmer*. Fixed factors included fertilizing condition (yes or no),  
566 coexistence history (considered as “same” or “different”), crop species number (2 vs 4) nested

567 in monoculture vs mixture, as well as the interactions between them. Species composition and  
568 bed were set as random factors. Effect sizes were calculated from marginal means obtained  
569 using the function *emmeans*, and pairwise comparisons were calculated using Tukey tests  
570 from the *emmeans* function<sup>68</sup>. To analyze the effects of the experimental treatments on the  
571 mean and coefficient of variation of the different traits per species (height, width, SLA,  
572 LDMC, mass per seed, respectively), we used generalized linear mixed models using *lmer*  
573 with the same fixed factors as previously described. Species, species composition and bed  
574 were set as random factors. The response variables were log-transformed or square-root-  
575 transformed where needed. To analyse the response of FPAR, we used similar linear mixed  
576 models as described above, but added day of year as a random factor. For all models, we  
577 tested for normality of the residuals using a Shapiro-Wilk test and homogeneity of the  
578 variance using a Levene test.

579

## 580 **Reference Methods**

- 581 47. Roscher, C. *et al.* Overyielding in experimental grassland communities – irrespective of species  
582 pool or spatial scale. *Ecol. Lett.* **8**, 419–429 (2005).
- 583 48. Isbell, F. *et al.* Quantifying effects of biodiversity on ecosystem functioning across times and  
584 places. *Ecol. Lett.* **21**, 763–778 (2018).
- 585 49. Hai, L., Wagner, C. & Friedt, W. Quantitative structure analysis of genetic diversity among  
586 spring bread wheats (*Triticum aestivum* L.) from different geographical regions. *Genetica* **130**,  
587 213–225 (2007).
- 588 50. Loureiro, I., Escorial, M. C., González, Á. & Chueca, M. C. Pollen-mediated gene flow in  
589 wheat (*Triticum aestivum* L.) in a semiarid field environment in Spain. *Transgenic Res.* **21**,  
590 1329–1339 (2012).
- 591 51. Lawrie, R. G., Matus-Cádiz, M. A. & Hucl, P. Estimating Out-Crossing Rates in Spring Wheat  
592 Cultivars Using the Contact Method. *Crop Sci.* **46**, 247–249 (2006).
- 593 52. Shorter, R., Gibson, P. & Frey, K. J. Outscoring Rates in Oat Species Crosses (*Avena sativa* L.  
594  $\times$  *A. sterilis* L.)<sup>1</sup>. *Crop Sci.* **18**, 877–878 (1978).
- 595 53. Horneburg, B. & Weber, W. E. Outcrossing in lentil (*Lens culinaris*) depends on cultivar,

- 596 location and year, and varies within cultivars. *Plant Breed.* **125**, 638–640 (2006).
- 597 54. Jhala, A. J., Bhatt, H., Topinka, K. & Hall, L. M. Pollen-mediated gene flow in flax (*Linum*  
598 *usitatissimum* L.): can genetically engineered and organic flax coexist? *Heredity (Edinb)*. **106**,  
599 557 (2011).
- 600 55. BLAUES WUNDER, LIN□» Acheter des semences bio en ligne / Engrais verts - SATIVA  
601 Online Shop. [https://www.sativa.bio/fr\\_ch/engrais-verts/blau-es-wunder-lin-prospecierara-gr31](https://www.sativa.bio/fr_ch/engrais-verts/blau-es-wunder-lin-prospecierara-gr31).
- 602 56. Vromans, J., van de Bilt, E., Pieper, B., Stam, P. & van Eck, H. J. Molecular genetic studies in  
603 flax. (2006).
- 604 57. Hoque, A., Fiedler, J. D. & Rahman, M. Genetic diversity analysis of a flax (*Linum*  
605 *usitatissimum* L.) global collection. *BMC Genomics* **21**, 1–13 (2020).
- 606 58. Choudhary, S., Sharma, R., Nehru, J., Vishwavidyalaya, K. & Vishal, M. K. Molecular  
607 diversity in coriander (*Coriandrum sativum*) using RAPD and ISSR markers. *Indian J. Agric.*  
608 *Sci.* **89**, 193–198 (2019).
- 609 59. Singh, S. K. *et al.* Studies on genetic divergence among Indian varieties of a spice herb,  
610 *Coriandrum sativum*. *J. Environ. Biol.* **33**, 781–789 (2012).
- 611 60. Diederichsen, A. *Coriander (Coriandrum sativum L.). Promoting the conservation and use of*  
612 *underutilized and neglected crops.* (1996).
- 613 61. Walsh, K. D. *et al.* Short communication: First report of outcrossing rates in camelina  
614 [*camelina sativa* (L.) crantz], a potential platform for bioindustrial oils. *Can. J. Plant Sci.* **92**,  
615 681–685 (2012).
- 616 62. Walsh, K. D., Hills, M. J., Martin, S. L. & Hall, L. M. Pollen-mediated Gene Flow in Camelina  
617 *sativa* (L.) Crantz. *Crop Sci.* **55**, 196–202 (2015).
- 618 63. Cornelissen, J. H. C. *et al.* A handbook of protocols for standardised and easy measurement of  
619 plant functional traits worldwide. *Aust. J. Bot.* **51**, 335–380 (2003).
- 620 64. Schneider, C. A., Rasband, W. S. & Eliceiri, K. W. NIH Image to ImageJ: 25 years of image  
621 analysis. *Nature Methods* vol. 9 671–675 (2012).
- 622 65. R Core Team. A language and environment for statistical computing. Vienna, Austria: R  
623 Foundation for Statistical Computing. (2019).
- 624 66. Díaz-Sierra, R., Verwijmeren, M., Rietkerk, M., de Dios, V. R. & Baudena, M. A new family  
625 of standardized and symmetric indices for measuring the intensity and importance of plant  
626 neighbour effects. *Methods in Ecology and Evolution* vol. 8 580–591 (2017).
- 627 67. Laliberte, E. & Legendre, P. A distance-based framework for measuring functional diversity

628 from multiple traits. *Ecology* **91**, 299–305 (2010).

629 68. Lenth, R. V. emmeans: Estimated Marginal Means, aka Least-Squares Means. (2021)

630 doi:10.1080/00031305.1980.10483031.

631

## 632 **Acknowledgements**

633 We thank Elisa Pizarro Carbonell, Carlos Barriga Cabanillas, Anja Schmutz, Sandra Gonzalez

634 Sanchez, Lukas Meile, Carlos Federico Ingala, Roman Hüppi, Simon Baumgartner, Benjamin

635 Wilde, Manon Longepierre, Marijn Van de Broek, Leonhard Späth, Inea Lehner, Anna

636 Bugmann, Jianguo Chen, Nicola Haggenmacher and Zita Sartori for their help in the field,

637 and Johan Six for comments on the experimental design. We also thank the Aprisco de Las

638 Corchuelas Field Station and the University of Zurich for the use of their facilities. The study

639 was funded by the Swiss National Science Foundation (PP00P3\_170645).

## 640 **Author contributions**

641 LS, NE, and CS conceptualised the study; LS and CS designed the experiment; LS, NE, and

642 CS carried out the experiment, LS and CS analysed the data; LS and CS wrote the paper with

643 input from NE.

## 644 **Competing interests**

645 The authors declare no competing financial interests.

## 646 **Materials & Correspondence**

647 Correspondence and requests for materials should be addressed to Laura Stefan.

## 648 **Data availability statement**

649 The data that support the findings of this study are available on Zenodo:

650 <https://doi.org/10.5281/zenodo.5223410>



651 **Code availability statement**

652 The R code is available on Zenodo: <https://doi.org/10.5281/zenodo.5223410>

653

654 **Extended Data**

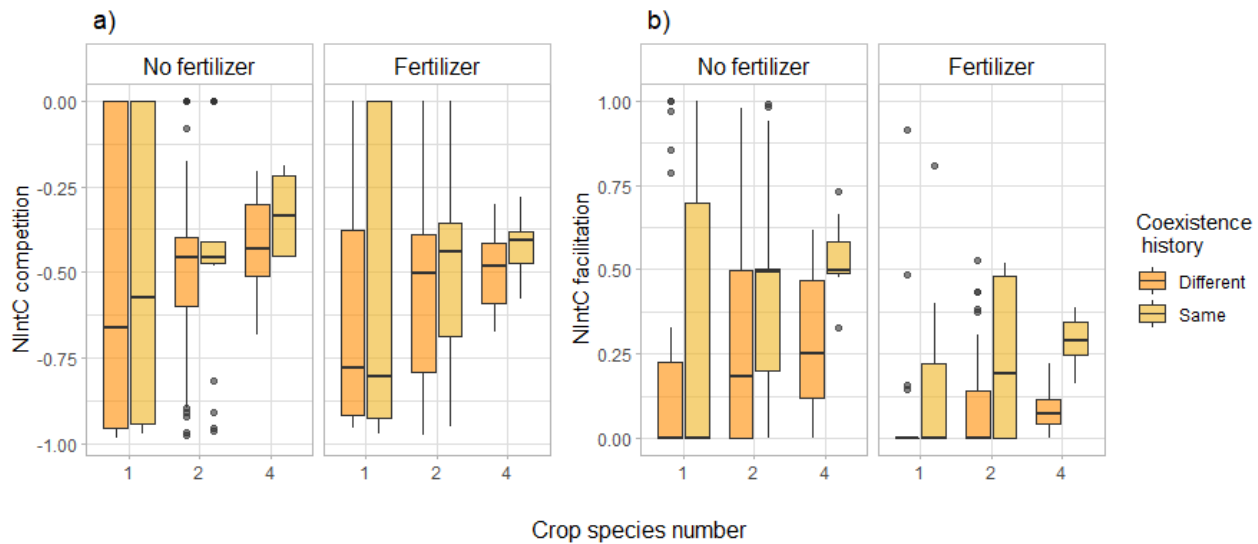

**Extended Data Figure 1:** Effects of coexistence history and crop species number on competition (a), and facilitation (b) indexes, for fertilized and unfertilized conditions. “Same coexistence history” indicates that crops were grown in the community their seeds were collected from. “Different coexistence history” refers to crops grown in a community different to the one of their parents. See methods for the index calculations.

Horizontal lines represent the median of the data, boxes represent the lower and upper quartiles (25% and 75%), with vertical lines extending from the hinge of the box to the smallest and largest values, no further than 1.5 \* the interquartile range. Data beyond the end of the whiskers are outlying and plotted individually. n =276

655

**Extended Data Table 1. Type-I Analysis of Variance table of the experimental treatment effects on net, competition and facilitation indexes, in 2020**

*DenDF*, degrees of freedom of error term; *NumDF*, degrees of freedom of term; *F-value*, variance ratio; *Pr(>F)*, error probability. P-values in bold are significant at  $\alpha = 0.05$ ; \* ( $P < 0.05$ ), \*\* ( $P < 0.01$ ), \*\*\* ( $P < 0.001$ ). n =276

|                                            | <i>NumDF</i> | <i>Net</i>   |                |                     | <i>Competition</i> |                |                  | <i>Facilitation</i> |                |                     |
|--------------------------------------------|--------------|--------------|----------------|---------------------|--------------------|----------------|------------------|---------------------|----------------|---------------------|
|                                            |              | <i>DenDF</i> | <i>F value</i> | <i>Pr(&gt;F)</i>    | <i>DenDF</i>       | <i>F value</i> | <i>Pr(&gt;F)</i> | <i>DenDF</i>        | <i>F value</i> | <i>Pr(&gt;F)</i>    |
| <i>Fertilizer</i>                          | 1            | 7.02         | 36.269         | <b>0.0005</b> ***   | 6.82               | 18.658         | <b>0.0037</b> ** | 6.74                | 39.646         | <b>0.0005</b> ***   |
| <i>History</i>                             | 1            | 238.10       | 31.901         | <b>4.61E-08</b> *** | 232.57             | 9.071          | <b>0.0029</b> ** | 236.53              | 38.318         | <b>2.63E-09</b> *** |
| <i>Monocultures vs. mixtures</i>           | 1            | 19.99        | 0.571          | 0.4587              | 20.00              | 0.343          | 0.5647           | 19.97               | 0.945          | 0.3425              |
| <i>Diversity</i>                           | 1            | 19.97        | 0.110          | 0.7438              | 20.00              | 0.084          | 0.7756           | 19.90               | 0.159          | 0.6942              |
| <i>Fertilizer x history</i>                | 1            | 237.87       | 0.205          | 0.6509              | 232.63             | 0.279          | 0.5982           | 236.49              | 0.921          | 0.3383              |
| <i>Fertilizer x mono vs. mix</i>           | 1            | 242.37       | 0.695          | 0.4054              | 243.37             | 0.036          | 0.8493           | 242.65              | 1.269          | 0.2611              |
| <i>Fertilizer x diversity</i>              | 1            | 240.31       | 0.305          | 0.5816              | 241.70             | 0.075          | 0.7852           | 240.70              | 0.374          | 0.5415              |
| <i>History x mono vs. mix</i>              | 1            | 240.38       | 1.319          | 0.2518              | 241.43             | 0.253          | 0.6152           | 240.79              | 2.149          | 0.1440              |
| <i>History x diversity</i>                 | 1            | 240.50       | 0.912          | 0.3405              | 241.93             | 0.279          | 0.5977           | 240.88              | 1.111          | 0.2928              |
| <i>Fertilizer x history x mono vs. mix</i> | 1            | 240.34       | 0.022          | 0.8836              | 241.39             | 0.000          | 0.9864           | 240.75              | 0.003          | 0.9567              |
| <i>Fertilizer x history x diversity</i>    | 1            | 240.42       | 0.100          | 0.7523              | 241.89             | 0.296          | 0.5868           | 240.81              | 0.003          | 0.9542              |

656



**Extended Data Table 2. Pairwise comparisons of the effect of net interaction index between fertilizer (yes, no), coexistence history (diff [different], same), and monoculture vs mixture (mix [mixture], mono [monoculture]).**

| Net interaction index                | estimate         | SE            | df           | t.ratio       | p.value       |
|--------------------------------------|------------------|---------------|--------------|---------------|---------------|
| no diff mix - yes diff mix           | 2.54E-01         | 0.0604        | 33.1         | 4.206         | 0.0041        |
| <b>no diff mix - no same mix</b>     | <b>-2.73E-01</b> | <b>0.0705</b> | <b>237.2</b> | <b>-3.877</b> | <b>0.0034</b> |
| no diff mix - yes same mix           | 2.33E-02         | 0.0725        | 60.5         | 0.321         | 1             |
| no diff mix - no diff mono           | 1.83E-01         | 0.2298        | 22.8         | 0.796         | 0.9917        |
| no diff mix - yes diff mono          | 3.58E-01         | 0.2303        | 23           | 1.553         | 0.7718        |
| no diff mix - no same mono           | 2.34E-02         | 0.2365        | 25.5         | 0.099         | 1             |
| no diff mix - yes same mono          | 2.48E-01         | 0.2371        | 25.9         | 1.047         | 0.9621        |
| yes diff mix - no same mix           | -5.28E-01        | 0.0729        | 57.2         | -7.233        | <.0001        |
| <b>yes diff mix - yes same mix</b>   | <b>-2.31E-01</b> | <b>0.0694</b> | <b>242</b>   | <b>-3.328</b> | <b>0.0222</b> |
| yes diff mix - no diff mono          | -7.13E-02        | 0.2308        | 23.1         | -0.309        | 1             |
| yes diff mix - yes diff mono         | 1.04E-01         | 0.2293        | 22.7         | 0.452         | 0.9998        |
| yes diff mix - no same mono          | -2.31E-01        | 0.2372        | 25.9         | -0.973        | 0.9744        |
| yes diff mix - yes same mono         | -5.87E-03        | 0.2362        | 25.5         | -0.025        | 1             |
| no same mix - yes same mix           | 2.97E-01         | 0.0832        | 84.3         | 3.565         | 0.0134        |
| no same mix - no diff mono           | 4.56E-01         | 0.2336        | 24.3         | 1.954         | 0.5303        |
| no same mix - yes diff mono          | 6.31E-01         | 0.2339        | 24.4         | 2.698         | 0.1706        |
| no same mix - no same mono           | 2.97E-01         | 0.2395        | 26.9         | 1.24          | 0.9124        |
| no same mix - yes same mono          | 5.22E-01         | 0.2406        | 27.3         | 2.168         | 0.4002        |
| yes same mix - no diff mono          | 1.60E-01         | 0.2342        | 24.5         | 0.681         | 0.9968        |
| yes same mix - yes diff mono         | 3.34E-01         | 0.2329        | 24.1         | 1.436         | 0.832         |
| yes same mix - no same mono          | 9.22E-05         | 0.2406        | 27.3         | 0             | 1             |
| yes same mix - yes same mono         | 2.25E-01         | 0.2395        | 26.9         | 0.939         | 0.979         |
| no diff mono - yes diff mono         | 1.75E-01         | 0.0848        | 90.2         | 2.062         | 0.4474        |
| <b>no diff mono - no same mono</b>   | <b>-1.59E-01</b> | <b>0.1</b>    | <b>242.7</b> | <b>-1.595</b> | <b>0.7527</b> |
| no diff mono - yes same mono         | 6.54E-02         | 0.1018        | 144.2        | 0.642         | 0.9982        |
| yes diff mono - no same mono         | -3.34E-01        | 0.101         | 144.6        | -3.31         | 0.0253        |
| <b>yes diff mono - yes same mono</b> | <b>-1.09E-01</b> | <b>0.0984</b> | <b>238.1</b> | <b>-1.111</b> | <b>0.9539</b> |
| no same mono - yes same mono         | 2.25E-01         | 0.1157        | 182.9        | 1.944         | 0.5228        |

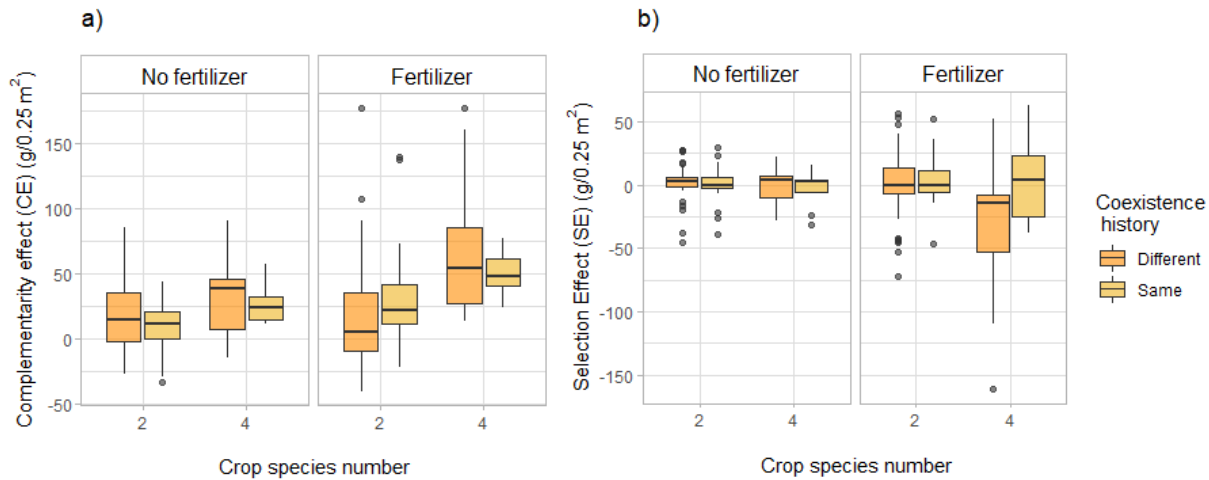

**Extended Data Figure 2:** Effects of coexistence history and crop species number on complementarity effect (a) and selection effect (b) in fertilized and unfertilized plots.

Horizontal lines represent the median of the data, boxes represent the lower and upper quartiles (25% and 75%), with vertical lines extending from the hinge of the box to the smallest and largest values, no further than  $1.5 \times$  the interquartile range. Data beyond the end of the whiskers are outlying and plotted individually.  $n=204$

659

**Extended Data Table 3. Type-I Analysis of Variance table of the experimental treatment effects on net, complementarity, and selection effects in 2020**

*DenDF*, degrees of freedom of error term; *NumDF*, degrees of freedom of term; *F-value*, variance ratio; *Pr(>F)*, error probability. P-values in bold are significant at  $\alpha = 0.1$ ; . ( $P < 0.1$ ); \* ( $P < 0.05$ ), \*\* ( $P < 0.01$ ), \*\*\* ( $P < 0.001$ ).  $n=204$

|                                         | <i>NumDF</i> | <i>Net effect</i> |                |                  | <i>Complementarity effect</i> |                |                  | <i>Selection effect</i> |                |                  |
|-----------------------------------------|--------------|-------------------|----------------|------------------|-------------------------------|----------------|------------------|-------------------------|----------------|------------------|
|                                         |              | <i>DenDF</i>      | <i>F value</i> | <i>Pr(&gt;F)</i> | <i>DenDF</i>                  | <i>F value</i> | <i>Pr(&gt;F)</i> | <i>DenDF</i>            | <i>F value</i> | <i>Pr(&gt;F)</i> |
| <i>Fertilizer</i>                       | 1            | 7.64              | 1.005          | 0.3468           | 7.38                          | 2.684          | 0.14312          | 7.69                    | 1.295          | 0.2894           |
| <i>History</i>                          | 1            | 177.34            | 0.162          | 0.6876           | 179.89                        | 1.567          | 0.2123           | 178.62                  | 1.512          | 0.2204           |
| <i>Diversity</i>                        | 1            | 14.90             | 2.583          | 0.1290           | 14.87                         | 5.887          | <b>0.0285</b> *  | 15.06                   | 4.009          | <b>0.0636</b> .  |
| <i>Fertilizer x history</i>             | 1            | 177.08            | 9.595          | <b>0.0023</b> ** | 179.80                        | 2.719          | 0.1009           | 178.66                  | 2.498          | 0.1158           |
| <i>Fertilizer x diversity</i>           | 1            | 173.48            | 0.197          | 0.6581           | 174.92                        | 5.579          | <b>0.0193</b> *  | 178.22                  | 6.092          | <b>0.0145</b> *  |
| <i>History x diversity</i>              | 1            | 173.66            | 0.052          | 0.8191           | 175.06                        | 1.399          | 0.2385           | 178.42                  | 3.165          | <b>0.0769</b> .  |
| <i>Fertilizer x history x diversity</i> | 1            | 173.36            | 0.046          | 0.8297           | 174.85                        | 2.026          | 0.1564           | 178.35                  | 4.093          | <b>0.0446</b> *  |

660

661

662

663

664

665

666

667

668

**Extended Data Table 4. Type-I Analysis of Variance table of the experimental<sup>669</sup>  
treatment effects on total crop yield per plot (square-root transformed)**

*DenDF*, degrees of freedom of error term; *NumDF*, degrees of freedom of term; *F-value*,<sup>670</sup>  
variance ratio; *Pr(>F)*, error probability. P-values in bold are significant at  $\alpha = 0.1$ ; . ( $P < 0.1$ ); \*  
( $P < 0.05$ ), \*\* ( $P < 0.01$ ), \*\*\* ( $P < 0.001$ ). n=276<sup>671</sup>

|                                            | <i>NumDF</i> | <i>DenDF</i> | <i>F value</i> | <i>Pr(&gt;F)</i>   |     |
|--------------------------------------------|--------------|--------------|----------------|--------------------|-----|
| <i>Fertilizer</i>                          | 1            | 7.682        | 18.5184        | <b>0.002862</b> ** | 672 |
| <i>History</i>                             | 1            | 241.392      | 0.1812         | 0.670703           | 673 |
| <i>Mono vs. mixtures</i>                   | 1            | 19.973       | 3.5836         | <b>0.072934</b> .  |     |
| <i>Diversity</i>                           | 1            | 19.956       | 0.5134         | 0.481957           | 674 |
| <i>Fertilizer x history</i>                | 1            | 241.338      | 0.0003         | 0.986084           |     |
| <i>Fertilizer x mono vs. mix</i>           | 1            | 238.145      | 0.2223         | 0.637735           | 675 |
| <i>Fertilizer x diversity</i>              | 1            | 237.548      | 0.0887         | 0.766152           |     |
| <i>History x mono vs. mix</i>              | 1            | 237.451      | 0.0013         | 0.97136            | 676 |
| <i>History x diversity</i>                 | 1            | 237.596      | 0.0991         | 0.753181           |     |
| <i>Fertilizer x history x mono vs. mix</i> | 1            | 237.347      | 0.0326         | 0.856797           | 677 |
| <i>Fertilizer x history x diversity</i>    | 1            | 237.487      | 0.0385         | 0.844517           | 678 |

679

680

681

682

683

684

685

686

687

688

689

690

691

692

693

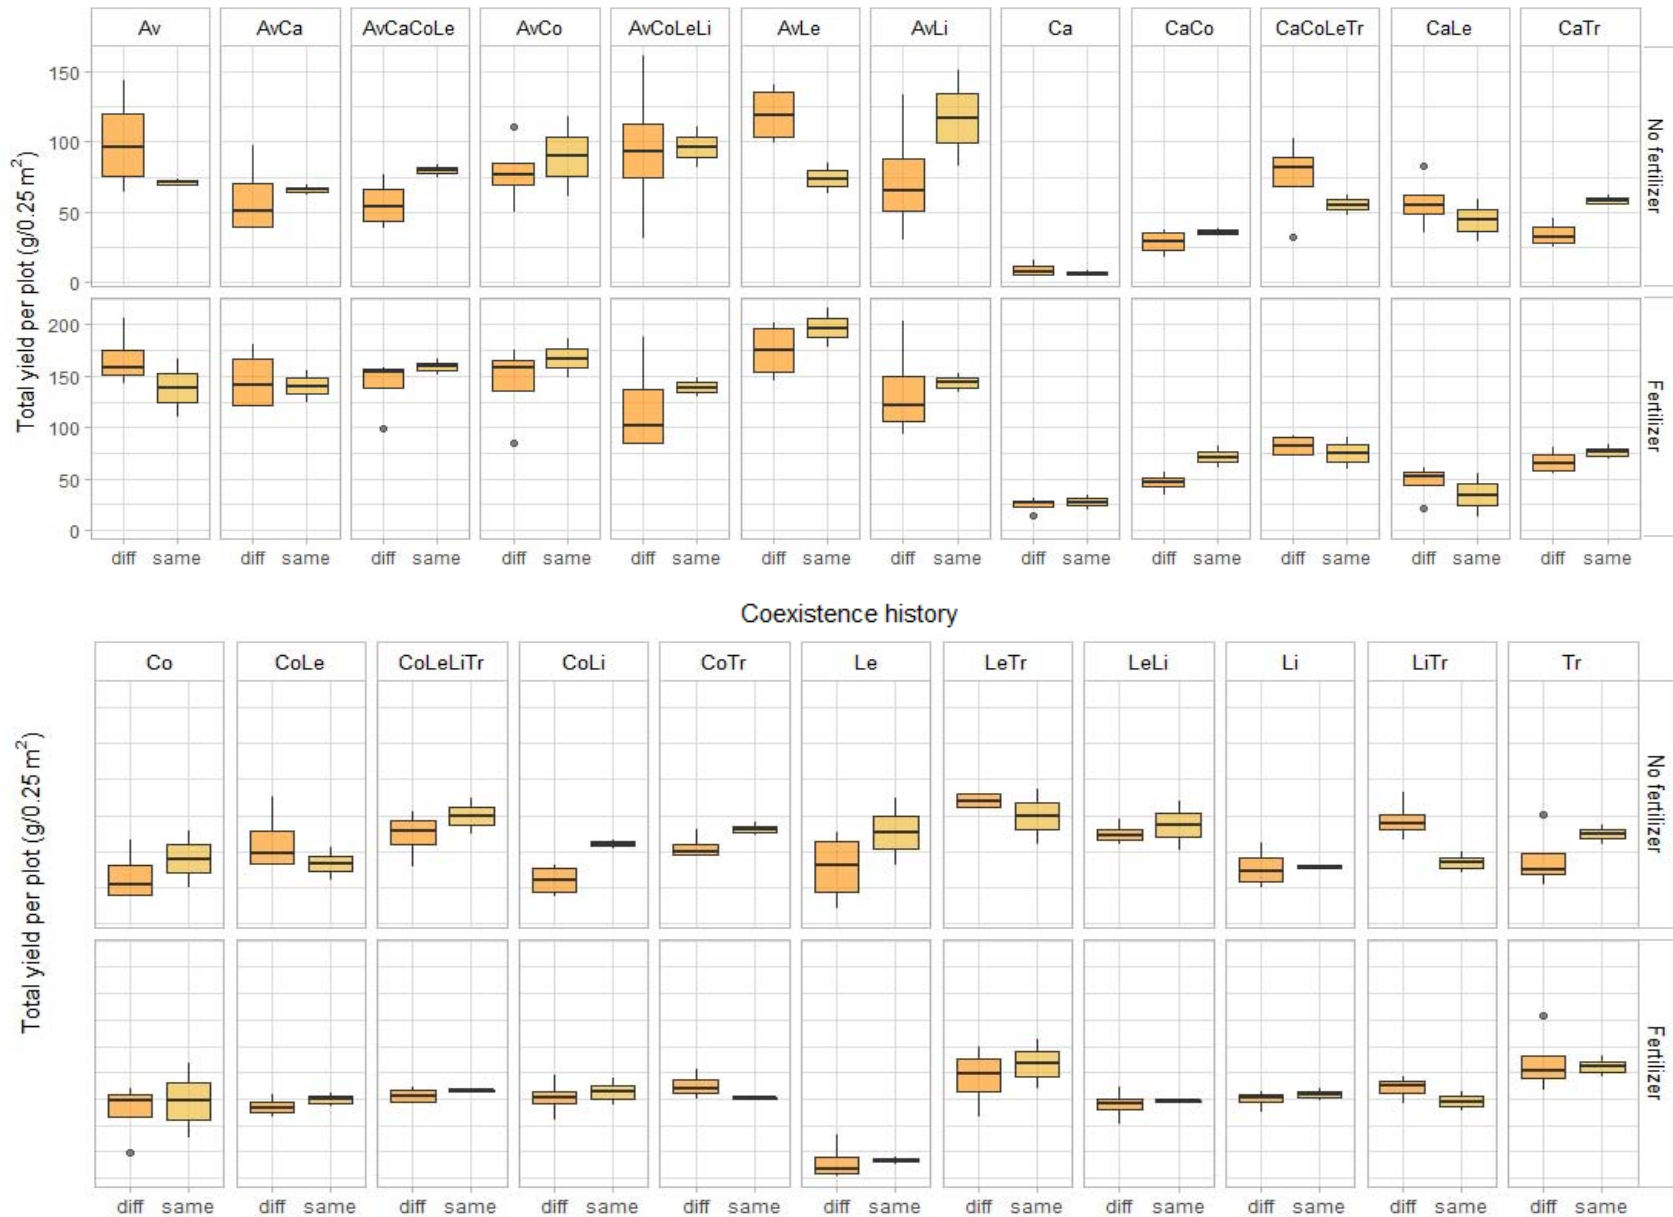

**Extended Data Figure 3:** Effects of coexistence history of total yield per plot, per species combination. “Same coexistence history” indicates that crops were grown in the community their seeds were collected from. “Different coexistence history” refers to crops grown in a community different to the one of their parents.

695  
696  
697  
698

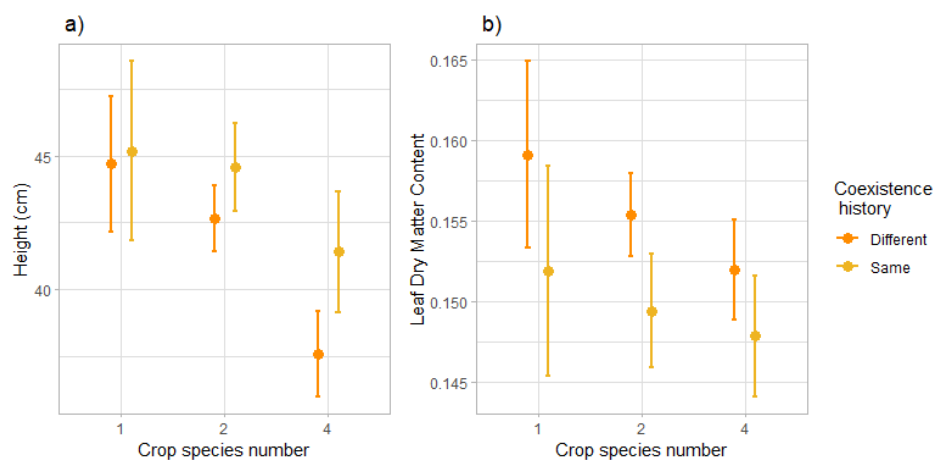

**Extended Data Figure 5:** Effects of coexistence history and crop species number on mean height (in cm) (a) and LDMC (b). Dots represent the averaged values across species and plots; lines represent the standard error.  $n = 1726$

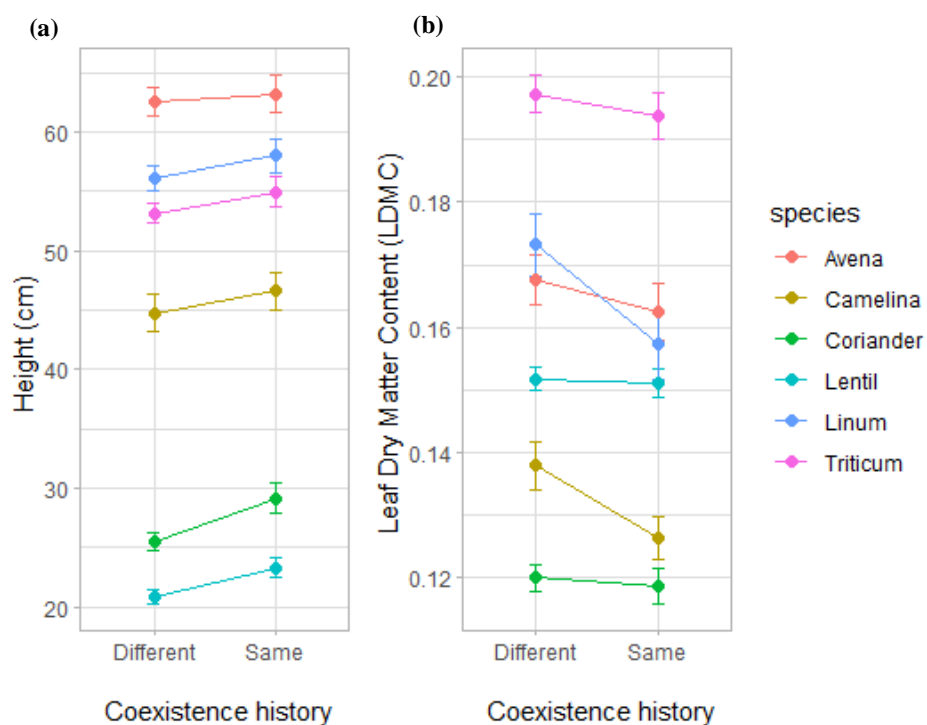

**Extended Data Figure 6:** Mean height (cm) (a) and LDMC (b) according to their coexistence history, for the six species considered in our study. Dots represent the averaged values across species and plots; lines represent the standard error.  $n = 1726$



**Extended Data Table 5. Type-I Analysis of Variance table of the experimental treatment effects on mean and coefficient of variation of height, per species per plot (species level)**

*DenDF*, degrees of freedom of error term; *NumDF*, degrees of freedom of term; *F-value*, variance ratio; *Pr(>F)*, error probability. P-values in bold are significant at  $\alpha = 0.05$ ; \* ( $P < 0.05$ ), \*\* ( $P < 0.01$ ), \*\*\* ( $P < 0.001$ ), n=1726

|                                            | <i>Mean</i>  |              |                |                    | <i>Coefficient of variation</i> |                |                    |
|--------------------------------------------|--------------|--------------|----------------|--------------------|---------------------------------|----------------|--------------------|
|                                            | <i>NumDF</i> | <i>DenDF</i> | <i>F value</i> | <i>Pr(&gt;F)</i>   | <i>DenDF</i>                    | <i>F value</i> | <i>Pr(&gt;F)</i>   |
| <i>Fertilizer</i>                          | 1            | 7.9          | 0.2292         | 0.645078           | 7.04                            | 16.8065        | <b>4.51E-03</b> ** |
| <i>History</i>                             | 1            | 169.16       | 4.2929         | <b>0.039789</b> *  | 197.26                          | 0.077          | 0.781684           |
| <i>Mono vs. mixtures</i>                   | 1            | 23.57        | 0.1617         | 0.691188           | 45.01                           | 0.325          | 0.571472           |
| <i>Diversity</i>                           | 1            | 10.68        | 0.121          | 0.73467            | 45.48                           | 0.2586         | 0.61356            |
| <i>Fertilizer x history</i>                | 1            | 168.93       | 0.1986         | 0.656442           | 197.18                          | 5.8068         | <b>0.016883</b> *  |
| <i>Fertilizer x mono vs. mix</i>           | 1            | 416.7        | 9.2129         | <b>0.002554</b> ** | 487.47                          | 5.0102         | <b>0.025648</b> *  |
| <i>Fertilizer x diversity</i>              | 1            | 118.78       | 0.0013         | 0.971368           | 127.23                          | 0.0009         | 0.976698           |
| <i>History x mono vs. mix</i>              | 1            | 418.29       | 1.435          | 0.231632           | 483.31                          | 0.2095         | 0.647359           |
| <i>History x diversity</i>                 | 1            | 119.33       | 0.6601         | 0.418149           | 128.24                          | 0.1385         | 0.710429           |
| <i>Fertilizer x history x mono vs. mix</i> | 1            | 417.97       | 0.0046         | 0.945955           | 483.3                           | 0.5825         | 0.445694           |
| <i>Fertilizer x history x diversity</i>    | 1            | 119.15       | 0.065          | 0.79923            | 128.25                          | 0.0665         | 0.796946           |

699

700

**Extended Data Table 6. Type-I Analysis of Variance table of the experimental treatment effects on mean and coefficient of variation of width, per species per plot (species level)**

*DenDF*, degrees of freedom of error term; *NumDF*, degrees of freedom of term; *F-value*, variance ratio; *Pr(>F)*, error probability. P-values in bold are significant at  $\alpha = 0.1$ ; . ( $P < 0.1$ ); \* ( $P < 0.05$ ), \*\* ( $P < 0.01$ ), \*\*\* ( $P < 0.001$ ), n=1726

|                                            | <i>Mean</i>  |              |                |                  | <i>Coefficient of variation</i> |                |                  |
|--------------------------------------------|--------------|--------------|----------------|------------------|---------------------------------|----------------|------------------|
|                                            | <i>NumDF</i> | <i>DenDF</i> | <i>F value</i> | <i>Pr(&gt;F)</i> | <i>DenDF</i>                    | <i>F value</i> | <i>Pr(&gt;F)</i> |
| <i>Fertilizer</i>                          | 1            | 7.59         | 8.5571         | <b>0.02027</b> * | 7.34                            | 4.8793         | <b>6.12E-02</b>  |
| <i>History</i>                             | 1            | 531.5        | 2.0724         | 0.15057          | 233.05                          | 2.5024         | 0.11503          |
| <i>Mono vs. mixtures</i>                   | 1            | 19.68        | 0.9369         | 0.34482          | 534.07                          | 0.0141         | 0.90552          |
| <i>Diversity</i>                           | 1            | 10.47        | 0.0639         | 0.80529          | 144.7                           | 0.8817         | 0.3493           |
| <i>Fertilizer x history</i>                | 1            | 530.95       | 1.6511         | 0.19937          | 232.84                          | 0.0033         | 0.9541           |
| <i>Fertilizer x mono vs. mix</i>           | 1            | 523.5        | 2.5201         | 0.11301          | 533.17                          | 0.7796         | 0.37767          |
| <i>Fertilizer x diversity</i>              | 1            | 526.73       | 3.905          | <b>0.04866</b> * | 142.23                          | 0.2794         | 0.59791          |
| <i>History x mono vs. mix</i>              | 1            | 522.6        | 0.1858         | 0.66657          | 528.21                          | 1.4807         | 0.2242           |
| <i>History x diversity</i>                 | 1            | 526.98       | 1.1295         | 0.28837          | 144.44                          | 1.1028         | 0.2954           |
| <i>Fertilizer x history x mono vs. mix</i> | 1            | 522.34       | 0.054          | 0.81631          | 528.23                          | 1.7197         | 0.1903           |
| <i>Fertilizer x history x diversity</i>    | 1            | 526.26       | 0.9072         | 0.3413           | 144.54                          | 0.8736         | 0.35153          |

701

702

703

704

**Extended Data Table 7. Type-I Analysis of Variance table of the experimental treatment effects on mean and coefficient of variation of SLA, per species per plot (species level)**

*DenDF*, degrees of freedom of error term; *NumDF*, degrees of freedom of term; *F-value*, variance ratio; *Pr(>F)*, error probability. P-values in bold are significant at  $\alpha = 0.1$ ; . ( $P < 0.1$ ); \* ( $P < 0.05$ ), \*\* ( $P < 0.01$ ), \*\*\* ( $P < 0.001$ ),  $n=1726$

|                                            | Mean         |              |                |                  | Coefficient of variation |                |                    |
|--------------------------------------------|--------------|--------------|----------------|------------------|--------------------------|----------------|--------------------|
|                                            | <i>NumDF</i> | <i>DenDF</i> | <i>F value</i> | <i>Pr(&gt;F)</i> | <i>DenDF</i>             | <i>F value</i> | <i>Pr(&gt;F)</i>   |
| <i>Fertilizer</i>                          | 1            | 7.8          | 9.3229         | <b>0.01623</b> * | 7.7                      | 7.4375         | <b>0.026891</b> *  |
| <i>History</i>                             | 1            | 203.35       | 0.0678         | 0.79477          | 224.44                   | 0.141          | 0.707662           |
| <i>Mono vs. mixtures</i>                   | 1            | 27.81        | 2.1781         | 0.15122          | 39.2                     | 1.8674         | 0.179558           |
| <i>Diversity</i>                           | 1            | 10.76        | 0.0715         | 0.79425          | 12.52                    | 3.0841         | 0.103467           |
| <i>Fertilizer x history</i>                | 1            | 203.8        | 0.2212         | 0.6386           | 224.52                   | 0.0117         | 0.914055           |
| <i>Fertilizer x mono vs. mix</i>           | 1            | 428.56       | 0.0664         | 0.79679          | 415.79                   | 7.1378         | <b>0.007844</b> ** |
| <i>Fertilizer x diversity</i>              | 1            | 144.51       | 0.2563         | 0.61342          | 168.99                   | 3.165          | <b>0.077029</b> .  |
| <i>History x mono vs. mix</i>              | 1            | 427.99       | 2.4804         | 0.11601          | 412.72                   | 0.0641         | 0.80022            |
| <i>History x diversity</i>                 | 1            | 146.35       | 1.0093         | 0.31674          | 169.58                   | 0.0099         | 0.920833           |
| <i>Fertilizer x history x mono vs. mix</i> | 1            | 427.9        | 0.0372         | 0.84708          | 412.49                   | 0.2757         | 0.599836           |
| <i>Fertilizer x history x diversity</i>    | 1            | 146.35       | 0.0089         | 0.92507          | 169.62                   | 0.1557         | 0.693661           |

**Extended Data Table 8. Type-I Analysis of Variance table of the experimental treatment effects on mean and coefficient of variation of LDMC, per species per plot (species level)**

*DenDF*, degrees of freedom of error term; *NumDF*, degrees of freedom of term; *F-value*, variance ratio; *Pr(>F)*, error probability. P-values in bold are significant at  $\alpha = 0.1$ ; . ( $P < 0.1$ ); \* ( $P < 0.05$ ), \*\* ( $P < 0.01$ ), \*\*\* ( $P < 0.001$ ),  $n=1726$

|                                            | Mean         |              |                |                  | Coefficient of variation |                |                     |
|--------------------------------------------|--------------|--------------|----------------|------------------|--------------------------|----------------|---------------------|
|                                            | <i>NumDF</i> | <i>DenDF</i> | <i>F value</i> | <i>Pr(&gt;F)</i> | <i>DenDF</i>             | <i>F value</i> | <i>Pr(&gt;F)</i>    |
| <i>Fertilizer</i>                          | 1            | 7.86         | 8.0352         | <b>0.02239</b> * | 186.4                    | 12.783         | <b>4.46E-04</b> *** |
| <i>History</i>                             | 1            | 183.84       | 3.5956         | <b>0.05950</b> . | 190.46                   | 0.0447         | 0.832786            |
| <i>Mono vs. mixtures</i>                   | 1            | 19.67        | 0.1589         | 0.69442          | 516.86                   | 0.0353         | 0.851015            |
| <i>Diversity</i>                           | 1            | 5.24         | 0.1083         | 0.75481          | 116.92                   | 0.6369         | 0.426449            |
| <i>Fertilizer x history</i>                | 1            | 181.59       | 0.0432         | 0.83566          | 190.48                   | 3.1314         | <b>0.078397</b> .   |
| <i>Fertilizer x mono vs. mix</i>           | 1            | 467.36       | 0.0294         | 0.86399          | 515.71                   | 0.6107         | 0.434889            |
| <i>Fertilizer x diversity</i>              | 1            | 115.57       | 0.3376         | 0.56232          | 114.6                    | 3.8577         | <b>0.051939</b> .   |
| <i>History x mono vs. mix</i>              | 1            | 468.83       | 0.0043         | 0.94775          | 515.4                    | 0.2779         | 0.598296            |
| <i>History x diversity</i>                 | 1            | 116.59       | 1.0418         | 0.30953          | 114.82                   | 0.9337         | 0.335923            |
| <i>Fertilizer x history x mono vs. mix</i> | 1            | 468.38       | 0.0166         | 0.89752          | 515.36                   | 1.6235         | 0.203176            |
| <i>Fertilizer x history x diversity</i>    | 1            | 116.48       | 0.0016         | 0.96772          | 114.88                   | 1.3649         | 0.24511             |

705

706

707

708

709

**Extended Data Table 9. Type-I Analysis of Variance table of the experimental treatment effects on mean and coefficient of variation of mass per seed, per species per plot (species level)**

*DenDF*, degrees of freedom of error term; *NumDF*, degrees of freedom of term; *F-value*, variance ratio; *Pr(>F)*, error probability. P-values in bold are significant at  $\alpha = 0.1$ ; . ( $P < 0.1$ ); \* ( $P < 0.05$ ), \*\* ( $P < 0.01$ ), \*\*\* ( $P < 0.001$ ), n=1726

|                                            | <i>Mean</i>  |              |                |                   | <i>Coefficient of variation</i> |                |                     |
|--------------------------------------------|--------------|--------------|----------------|-------------------|---------------------------------|----------------|---------------------|
|                                            | <i>NumDF</i> | <i>DenDF</i> | <i>F value</i> | <i>Pr(&gt;F)</i>  | <i>DenDF</i>                    | <i>F value</i> | <i>Pr(&gt;F)</i>    |
| <i>Fertilizer</i>                          | 1            | 210.65       | 4.3651         | <b>0.03788</b> *  | 180.24                          | 0.1253         | 7.24E-01            |
| <i>History</i>                             | 1            | 211.89       | 0.0491         | 0.82487           | 182.21                          | 0.0853         | 0.770551            |
| <i>Mono vs. mixtures</i>                   | 1            | 20.08        | 10.0297        | <b>0.00483</b> ** | 33.75                           | 17.0854        | <b>0.000223</b> *** |
| <i>Diversity</i>                           | 1            | 10.77        | 1.3367         | 0.27261           | 8.88                            | 0.1203         | 0.736758            |
| <i>Fertilizer x history</i>                | 1            | 211.88       | 0.6633         | 0.4163            | 182.12                          | 1.6601         | 0.199224            |
| <i>Fertilizer x mono vs. mix</i>           | 1            | 493.44       | 0.602          | 0.43818           | 474.87                          | 1.16           | 0.282008            |
| <i>Fertilizer x diversity</i>              | 1            | 137.39       | 0.3993         | 0.52848           | 118.13                          | 1.4557         | 0.230024            |
| <i>History x mono vs. mix</i>              | 1            | 493.59       | 1.4337         | 0.23174           | 470.19                          | 4.9519         | <b>0.026536</b> *   |
| <i>History x diversity</i>                 | 1            | 138.08       | 0.2159         | 0.64289           | 119.33                          | 0.2756         | 0.600592            |
| <i>Fertilizer x history x mono vs. mix</i> | 1            | 493.59       | 2.7072         | 0.10053           | 470.29                          | 0.0587         | 0.808609            |
| <i>Fertilizer x history x diversity</i>    | 1            | 138.1        | 0.6308         | 0.42842           | 119.29                          | 0.0329         | 0.856454            |

710

711

712

713

714

715

716

717

718

719

720

721

722

723

724

725

726

**Extended Data Table 10. Type-I Analysis of Variance table of the experimental treatment effects on community-weighted mean and coefficient of variation of height, per plot (community level)**

*DenDF*, degrees of freedom of error term; *NumDF*, degrees of freedom of term; *F-value*, variance ratio; *Pr(>F)*, error probability. P-values in bold are significant at  $\alpha = 0.1$ ; . ( $P < 0.1$ ); \* ( $P < 0.05$ ), \*\* ( $P < 0.01$ ), \*\*\* ( $P < 0.001$ ). n=271

|                                            | <i>CWM</i>   |              |                |                  | <i>Coefficient of variation</i> |                |                     |
|--------------------------------------------|--------------|--------------|----------------|------------------|---------------------------------|----------------|---------------------|
|                                            | <i>NumDF</i> | <i>DenDF</i> | <i>F value</i> | <i>Pr(&gt;F)</i> | <i>DenDF</i>                    | <i>F value</i> | <i>Pr(&gt;F)</i>    |
| <i>Fertilizer</i>                          | 1            | 7.804        | 2.687          | 1.41E-01         | 6.983                           | 7.6601         | <b>2.79E-02</b> *   |
| <i>History</i>                             | 1            | 231.321      | 0.5067         | 0.47728          | 234.457                         | 3.9279         | <b>0.04866</b> *    |
| <i>Mono vs. mixtures</i>                   | 1            | 19.976       | 0.0555         | 0.81612          | 20.095                          | 16.9763        | <b>0.000527</b> *** |
| <i>Diversity</i>                           | 1            | 19.985       | 0.1513         | 0.70145          | 19.944                          | 3.0898         | <b>0.094124</b> .   |
| <i>Fertilizer x history</i>                | 1            | 228.963      | 0.0912         | 0.76295          | 234.705                         | 0.6664         | 0.415143            |
| <i>Fertilizer x mono vs. mix</i>           | 1            | 227.04       | 5.6668         | <b>0.01812</b> * | 238.629                         | 5.7944         | <b>0.016838</b> *   |
| <i>Fertilizer x diversity</i>              | 1            | 226.105      | 0.7338         | 0.39255          | 235.462                         | 0.0078         | 0.929608            |
| <i>History x mono vs. mix</i>              | 1            | 226.029      | 0.4327         | 0.51136          | 235.769                         | 2.0403         | 0.154507            |
| <i>History x diversity</i>                 | 1            | 226.301      | 0.1589         | 0.69052          | 235.616                         | 0.1045         | 0.746762            |
| <i>Fertilizer x history x mono vs. mix</i> | 1            | 226.108      | 0.0055         | 0.9408           | 236.013                         | 0.0007         | 0.97901             |
| <i>Fertilizer x history x diversity</i>    | 1            | 226.151      | 0.0112         | 0.91576          | 235.639                         | 0.3324         | 0.564822            |

**Extended Data Table 11. Type-I Analysis of Variance table of the experimental treatment effects on community-weighted mean and coefficient of variation of width, per plot (community level)**

*DenDF*, degrees of freedom of error term; *NumDF*, degrees of freedom of term; *F-value*, variance ratio; *Pr(>F)*, error probability. P-values in bold are significant at  $\alpha = 0.1$ ; . ( $P < 0.1$ ); \* ( $P < 0.05$ ), \*\* ( $P < 0.01$ ), \*\*\* ( $P < 0.001$ ), n=271

|                                            | <i>CWM</i>   |              |                |                    | <i>Coefficient of variation</i> |                |                     |
|--------------------------------------------|--------------|--------------|----------------|--------------------|---------------------------------|----------------|---------------------|
|                                            | <i>NumDF</i> | <i>DenDF</i> | <i>F value</i> | <i>Pr(&gt;F)</i>   | <i>DenDF</i>                    | <i>F value</i> | <i>Pr(&gt;F)</i>    |
| <i>Fertilizer</i>                          | 1            | 7.484        | 6.0869         | <b>4.09E-02</b> *  | 7.352                           | 10.7862        | <b>1.25E-02</b> *   |
| <i>History</i>                             | 1            | 233.262      | 0.001          | 0.974539           | 239.502                         | 0.2976         | 0.585869            |
| <i>Mono vs. mixtures</i>                   | 1            | 19.917       | 1.7012         | 0.207003           | 20.153                          | 15.6397        | <b>0.000773</b> *** |
| <i>Diversity</i>                           | 1            | 19.935       | 0.383          | 0.543019           | 19.819                          | 2.4097         | 0.13641             |
| <i>Fertilizer x history</i>                | 1            | 231.77       | 1.6122         | 0.205462           | 239.1                           | 0.0345         | 0.852701            |
| <i>Fertilizer x mono vs. mix</i>           | 1            | 228.97       | 11.0067        | <b>0.001056</b> ** | 237.11                          | 8.7687         | <b>0.003376</b> **  |
| <i>Fertilizer x diversity</i>              | 1            | 227.323      | 3.9302         | <b>0.048631</b> *  | 233.942                         | 1.1993         | 0.274588            |
| <i>History x mono vs. mix</i>              | 1            | 227.213      | 0.1337         | 0.714952           | 234.231                         | 4.7012         | <b>0.031149</b> *   |
| <i>History x diversity</i>                 | 1            | 227.671      | 0.1338         | 0.714862           | 234.017                         | 0.029          | 0.864848            |
| <i>Fertilizer x history x mono vs. mix</i> | 1            | 227.362      | 0.391          | 0.532421           | 234.403                         | 2.0867         | 0.149924            |
| <i>Fertilizer x history x diversity</i>    | 1            | 227.418      | 0.3123         | 0.576817           | 233.993                         | 0.6311         | 0.427744            |

727

728

729

730

731

**Extended Data Table 12. Type-I Analysis of Variance table of the experimental treatment effects on community-weighted mean and coefficient of variation of SLA, per plot (community level)**

*DenDF*, degrees of freedom of error term; *NumDF*, degrees of freedom of term; *F-value*, variance ratio; *Pr(>F)*, error probability. P-values in bold are significant at  $\alpha = 0.1$ ; . ( $P < 0.1$ ); \* ( $P < 0.05$ ), \*\* ( $P < 0.01$ ), \*\*\* ( $P < 0.001$ ), n=271

|                                            | <i>CWM</i>   |              |                |                  | <i>Coefficient of variation</i> |                |                     |
|--------------------------------------------|--------------|--------------|----------------|------------------|---------------------------------|----------------|---------------------|
|                                            | <i>NumDF</i> | <i>DenDF</i> | <i>F value</i> | <i>Pr(&gt;F)</i> | <i>DenDF</i>                    | <i>F value</i> | <i>Pr(&gt;F)</i>    |
| <i>Fertilizer</i>                          | 1            | 7.612        | 0.8181         | 3.93E-01         | 7.426                           | 3.6336         | <b>9.59E-02</b> .   |
| <i>History</i>                             | 1            | 227.776      | 2.0837         | 0.15025          | 225.431                         | 2.4299         | 0.120442            |
| <i>Mono vs. mixtures</i>                   | 1            | 19.754       | 0.0616         | 0.80648          | 19.682                          | 15.332         | <b>0.000879</b> *** |
| <i>Diversity</i>                           | 1            | 19.858       | 0.0067         | 0.93546          | 20.339                          | 8.4912         | <b>0.008482</b> **  |
| <i>Fertilizer x history</i>                | 1            | 227.607      | 0.0158         | 0.89994          | 224.689                         | 0.8382         | 0.360883            |
| <i>Fertilizer x mono vs. mix</i>           | 1            | 225.127      | 0.4507         | 0.50268          | 222.442                         | 7.7108         | <b>0.005957</b> **  |
| <i>Fertilizer x diversity</i>              | 1            | 223.255      | 0.3865         | 0.53476          | 222.197                         | 3.5889         | <b>0.059465</b> .   |
| <i>History x mono vs. mix</i>              | 1            | 222.96       | 3.4724         | <b>0.06371</b> . | 220.028                         | 0.1602         | 0.689401            |
| <i>History x diversity</i>                 | 1            | 223.809      | 0.2463         | 0.62019          | 222.407                         | 0.1505         | 0.698459            |
| <i>Fertilizer x history x mono vs. mix</i> | 1            | 223.168      | 0.2017         | 0.65379          | 220.233                         | 0.5343         | 0.465566            |
| <i>Fertilizer x history x diversity</i>    | 1            | 223.828      | 0.0913         | 0.76284          | 221.495                         | 0.0051         | 0.943381            |

732

733

**Extended Data Table 13. Type-I Analysis of Variance table of the experimental treatment effects on community-weighted mean and coefficient of variation of LDMC, per plot (community level)**

*DenDF*, degrees of freedom of error term; *NumDF*, degrees of freedom of term; *F-value*, variance ratio; *Pr(>F)*, error probability. P-values in bold are significant at  $\alpha = 0.1$ ; . ( $P < 0.1$ ); \* ( $P < 0.05$ ), \*\* ( $P < 0.01$ ), \*\*\* ( $P < 0.001$ ), n=271

|                                            | <i>CWM</i>   |              |                |                   | <i>Coefficient of variation</i> |                |                    |
|--------------------------------------------|--------------|--------------|----------------|-------------------|---------------------------------|----------------|--------------------|
|                                            | <i>NumDF</i> | <i>DenDF</i> | <i>F value</i> | <i>Pr(&gt;F)</i>  | <i>DenDF</i>                    | <i>F value</i> | <i>Pr(&gt;F)</i>   |
| <i>Fertilizer</i>                          | 1            | 7.809        | 10.5893        | <b>1.20E-02</b> * | 7.368                           | 2.1001         | 1.88E-01           |
| <i>History</i>                             | 1            | 225.249      | 4.3323         | <b>0.03853</b> *  | 233.338                         | 4.1789         | <b>0.042053</b> *  |
| <i>Mono vs. mixtures</i>                   | 1            | 19.998       | 0.0614         | 0.80688           | 20.123                          | 10.747         | <b>0.003737</b> ** |
| <i>Diversity</i>                           | 1            | 20.012       | 0.0293         | 0.86579           | 19.46                           | 0.7439         | 0.39891            |
| <i>Fertilizer x history</i>                | 1            | 223.935      | 0.598          | 0.44016           | 233.38                          | 0.9977         | 0.318908           |
| <i>Fertilizer x mono vs. mix</i>           | 1            | 222.756      | 0.3654         | 0.54615           | 236.325                         | 4.6325         | <b>0.032385</b> *  |
| <i>Fertilizer x diversity</i>              | 1            | 221.841      | 0.0235         | 0.87843           | 232.776                         | 0.0154         | 0.901256           |
| <i>History x mono vs. mix</i>              | 1            | 221.728      | 0.1477         | 0.70108           | 233.192                         | 0.4468         | 0.504525           |
| <i>History x diversity</i>                 | 1            | 222.051      | 0.0037         | 0.95178           | 233                             | 0.3198         | 0.572283           |
| <i>Fertilizer x history x mono vs. mix</i> | 1            | 221.903      | 0.1505         | 0.69841           | 233.579                         | 2.708          | 0.101189           |
| <i>Fertilizer x history x diversity</i>    | 1            | 221.981      | 0.3306         | 0.56587           | 233.206                         | 0.8702         | 0.351866           |

734

735

736

737

**Extended Data Table 14. Type-I Analysis of Variance table of the experimental treatment effects on community-weighted mean and coefficient of variation of mass per seed, per plot (community level)**

*DenDF*, degrees of freedom of error term; *NumDF*, degrees of freedom of term; *F-value*, variance ratio; *Pr(>F)*, error probability. P-values in bold are significant at  $\alpha = 0.1$ ; . ( $P < 0.1$ ); \* ( $P < 0.05$ ), \*\* ( $P < 0.01$ ), \*\*\* ( $P < 0.001$ ), n=271

|                                            | <i>CWM</i>   |              |                |                  | <i>Coefficient of variation</i> |                |                    |
|--------------------------------------------|--------------|--------------|----------------|------------------|---------------------------------|----------------|--------------------|
|                                            | <i>NumDF</i> | <i>DenDF</i> | <i>F value</i> | <i>Pr(&gt;F)</i> | <i>DenDF</i>                    | <i>F value</i> | <i>Pr(&gt;F)</i>   |
| <i>Fertilizer</i>                          | 1            | 7.319        | 2.4734         | 0.15792          | 6.612                           | 1.0304         | 3.46E-01           |
| <i>History</i>                             | 1            | 240.762      | 0.3199         | 0.57217          | 225.443                         | 1.4213         | 0.234444           |
| <i>Mono vs. mixtures</i>                   | 1            | 20.012       | 0.1269         | 0.72535          | 20.021                          | 14.3694        | <b>0.001145</b> ** |
| <i>Diversity</i>                           | 1            | 19.996       | 0.004          | 0.9499           | 19.95                           | 0.5302         | 0.474995           |
| <i>Fertilizer x history</i>                | 1            | 235.451      | 0.0844         | 0.77174          | 226.003                         | 0.0292         | 0.864583           |
| <i>Fertilizer x mono vs. mix</i>           | 1            | 238.14       | 0.9245         | 0.33727          | 239.091                         | 0.1291         | 0.719721           |
| <i>Fertilizer x diversity</i>              | 1            | 235.395      | 0.3647         | 0.54651          | 236.191                         | 0.2304         | 0.631662           |
| <i>History x mono vs. mix</i>              | 1            | 235.632      | 1.5019         | 0.22161          | 236.507                         | 5.4785         | <b>0.020084</b> *  |
| <i>History x diversity</i>                 | 1            | 235.537      | 0.0009         | 0.9767           | 236.403                         | 0.1301         | 0.718673           |
| <i>Fertilizer x history x mono vs. mix</i> | 1            | 235.858      | 3.5455         | <b>0.06094</b> . | 236.836                         | 0.3515         | 0.553841           |
| <i>Fertilizer x history x diversity</i>    | 1            | 235.548      | 0.3137         | 0.57596          | 236.483                         | 0.1133         | 0.736717           |

738

739

740

741

742

743

744

745

746

747

748

749

750

751

752

753

754

755

756

757

758

759

760

761

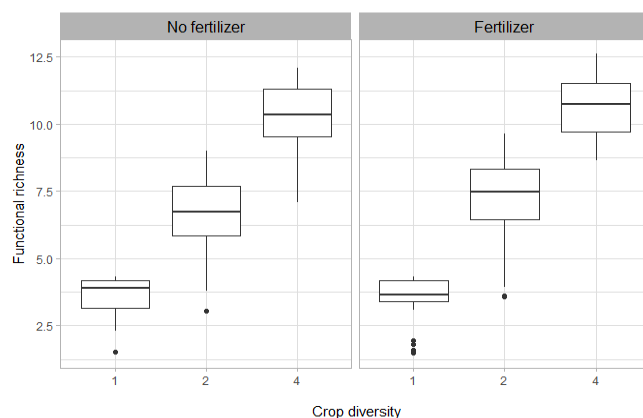

762

**Extended Data Figure 7:** Functional richness in response to crop species diversity, in fertilized and unfertilized plots. N=271

763

764

765

766

**Extended Data Table 15. Type-I Analysis of Variance table of the experimental treatment effects on functional richness**

767

*DenDF*, degrees of freedom of error term; *NumDF*, degrees of freedom of term; *F-value*, variance ratio; *Pr(>F)*, error probability. P-values in bold are significant at  $\alpha = 0.1$ ; . ( $P < 0.1$ ); \* ( $P < 0.05$ ), \*\* ( $P < 0.01$ ), \*\*\* ( $P < 0.001$ ). n=271

768

769

770

771

772

773

774

775

776

777

778

|                                         | <i>NumDF</i> | <i>DenDF</i> | <i>F value</i> | <i>Pr(&gt;F)</i>    |
|-----------------------------------------|--------------|--------------|----------------|---------------------|
| <i>Fertilizer</i>                       | 1            | 240.322      | 12.1182        | <b>0.000593</b> *** |
| <i>History</i>                          | 1            | 239.331      | 0.4763         | 0.490791            |
| <i>Diversity</i>                        | 2            | 20.095       | 224.893        | <b>1.76E-14</b> *** |
| <i>Fertilizer x history</i>             | 1            | 239.229      | 0.3573         | 0.550593            |
| <i>Fertilizer x diversity</i>           | 2            | 240.165      | 1.6086         | 0.202324            |
| <i>History x diversity</i>              | 2            | 239.277      | 0.1769         | 0.837967            |
| <i>Fertilizer x history x diversity</i> | 2            | 239.303      | 0.5828         | 0.559107            |

779  
780  
781  
782  
783  
784  
785  
786  
787  
788  
789  
790  
791  
792  
793  
794

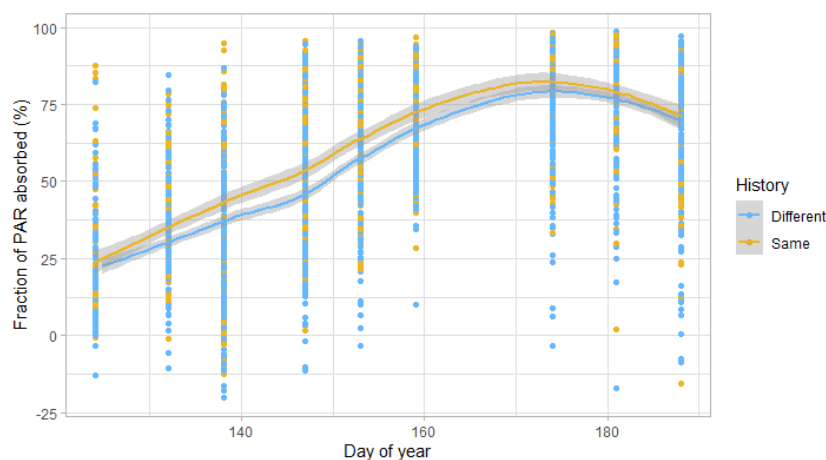

**Extended Data Figure 8:** Fraction of PAR absorbed (in %) according to the day of year, for plants with the same or different coexistence history. The lines represent local polynomial regression fittings, with the grey area representing the 0.95 confidence interval. n=2484.

**Extended Data Table 16. Type-I Analysis of Variance table of the experimental treatment effects on FPAR**

*DenDF*, degrees of freedom of error term; *NumDF*, degrees of freedom of term; *F-value*, variance ratio; *Pr(>F)*, error probability. P-values in bold are significant at  $\alpha = 0.05$ ; \* ( $P < 0.05$ ), \*\* ( $P < 0.01$ ), \*\*\* ( $P < 0.001$ ). n=2484

|                                            | <i>NumDF</i> | <i>DenDF</i> | <i>F value</i>   | <i>Pr(&gt;F)</i>    |
|--------------------------------------------|--------------|--------------|------------------|---------------------|
| <i>Fertilizer</i>                          | 1            | 7.76         | 18.986<br>15.396 | <b>0.002604</b> **  |
| <i>History</i>                             | 1            | 2420.53      | 2                | <b>8.96E-05</b> *** |
| <i>Mono vs. mixtures</i>                   | 1            | 20.03        | 1.3841           | 0.253196            |
| <i>Diversity</i>                           | 1            | 19.98        | 0.4482           | 0.510868            |
| <i>Fertilizer x history</i>                | 1            | 2421.07      | 1.0275           | 0.310837            |
| <i>Fertilizer x mono vs. mix</i>           | 1            | 2445.01      | 2.2105           | 0.137204            |
| <i>Fertilizer x diversity</i>              | 1            | 2443.87      | 0.0309           | 0.86054             |
| <i>History x mono vs. mix</i>              | 1            | 2443.67      | 0.4901           | 0.483969            |
| <i>History x diversity</i>                 | 1            | 2444.07      | 0.0881           | 0.7666              |
| <i>Fertilizer x history x mono vs. mix</i> | 1            | 2442.98      | 0.0041           | 0.948804            |
| <i>Fertilizer x history x diversity</i>    | 1            | 2443.39      | 0.1576           | 0.691409            |
